# Supplementary material for: Simultaneous hyperaccumulation of nickel and cobalt in the tree Glochidion cf. sericeum (Phyllanthaceae): elemental distribution and chemical speciation
Source: PubMed Central journal article supplement (PMC6018747; doi:10.1038/s41598-018-26891-7), 2018-06-26
Supplement: 41598_2018_26891_MOESM1_ESM.pdf [file 41598_2018_26891_MOESM1_ESM.pdf]

**Simultaneous hyperaccumulation of nickel and cobalt in  
the tree *Glochidion cf. sericeum* (Phyllanthaceae):  
elemental distribution and chemical speciation**

Antony van der Ent<sup>1,2\*</sup>, Rachel Mak<sup>3</sup>, Martin D. de Jonge<sup>4</sup>, Hugh H. Harris<sup>5\*</sup>

<sup>1</sup>Centre for Mined Land Rehabilitation, Sustainable Minerals Institute, The University of  
Queensland, Australia.

<sup>2</sup>Laboratoire Sols et Environnement, Université de Lorraine, France.

<sup>3</sup>Department of Chemistry, University of Sydney, Australia

<sup>4</sup>Australian Synchrotron, ANSTO, Australia

<sup>5</sup>Department of Chemistry, The University of Adelaide, Australia.

*\*Corresponding authors: a.vanderent@uq.edu.au, hugh.harris@adelaide.edu.au*

SUPPL FIG 1

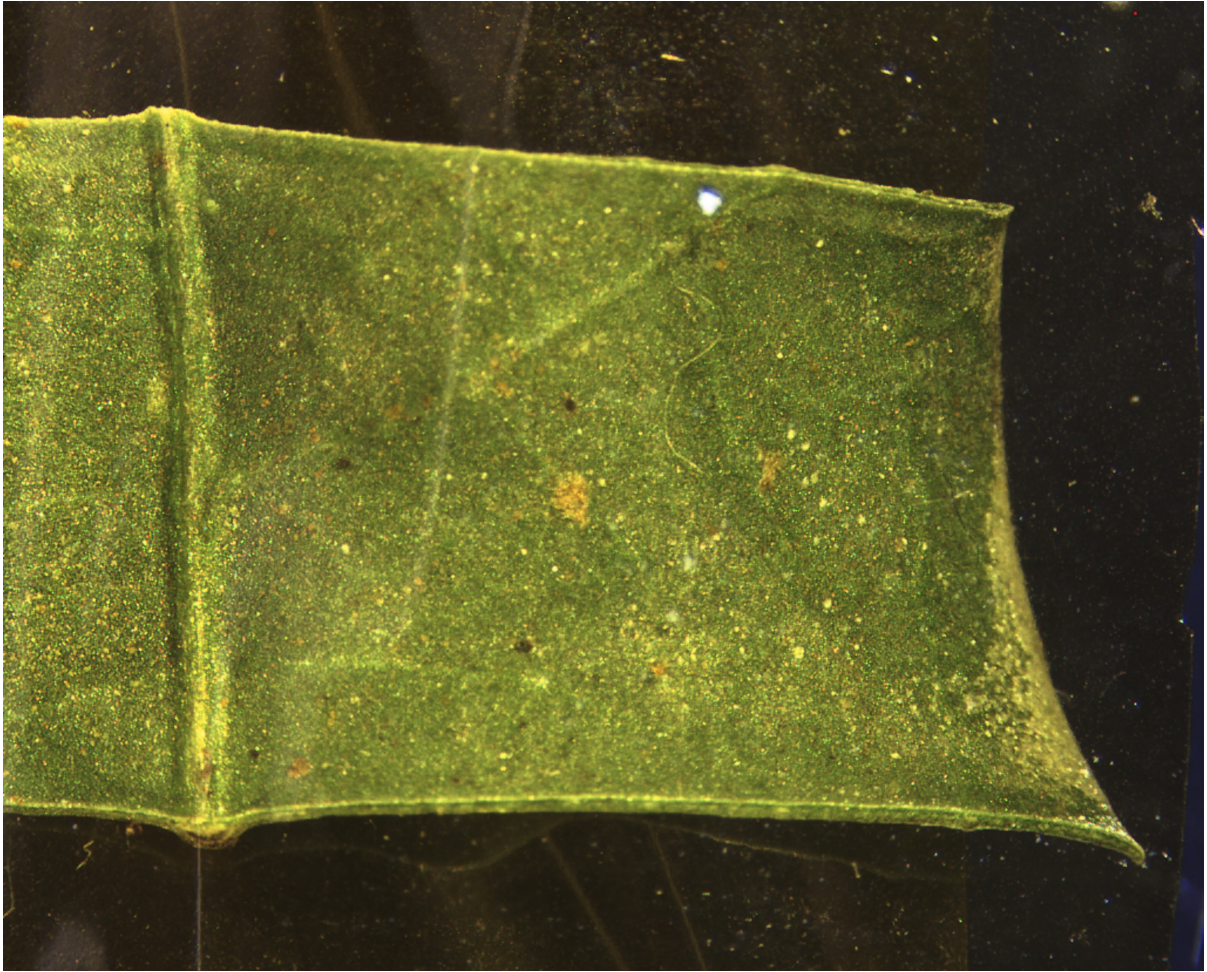

**Supplementary Figure 1.** Bright-field light microscopy image of the *Glochidion sericeum* leaf from Figures 3–4.

SUPPL FIG 2

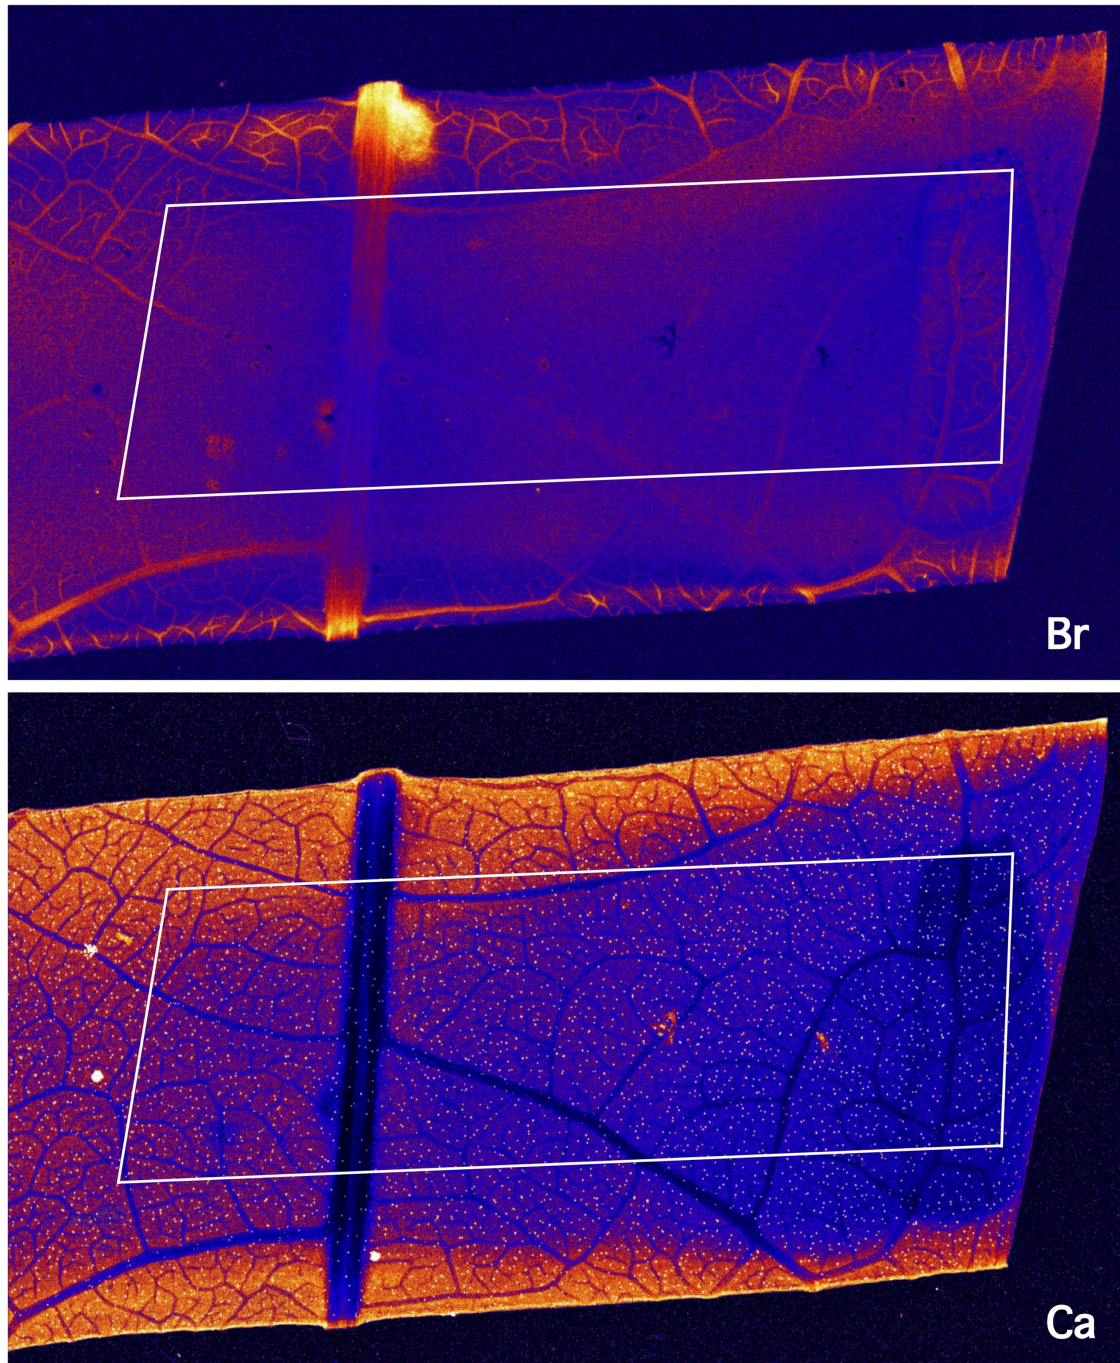

**Supplementary Figure 2.** Individual elemental  $\mu$ XRF maps for Br and Ca of the frozen-hydrated *Glochidion sericeum* foliar portion from Fig. 3–4. These elements represent the most and the least diffusible elements and were used to probe for the effects of thawing during the XFM scan.

### SUPPL FIG 3

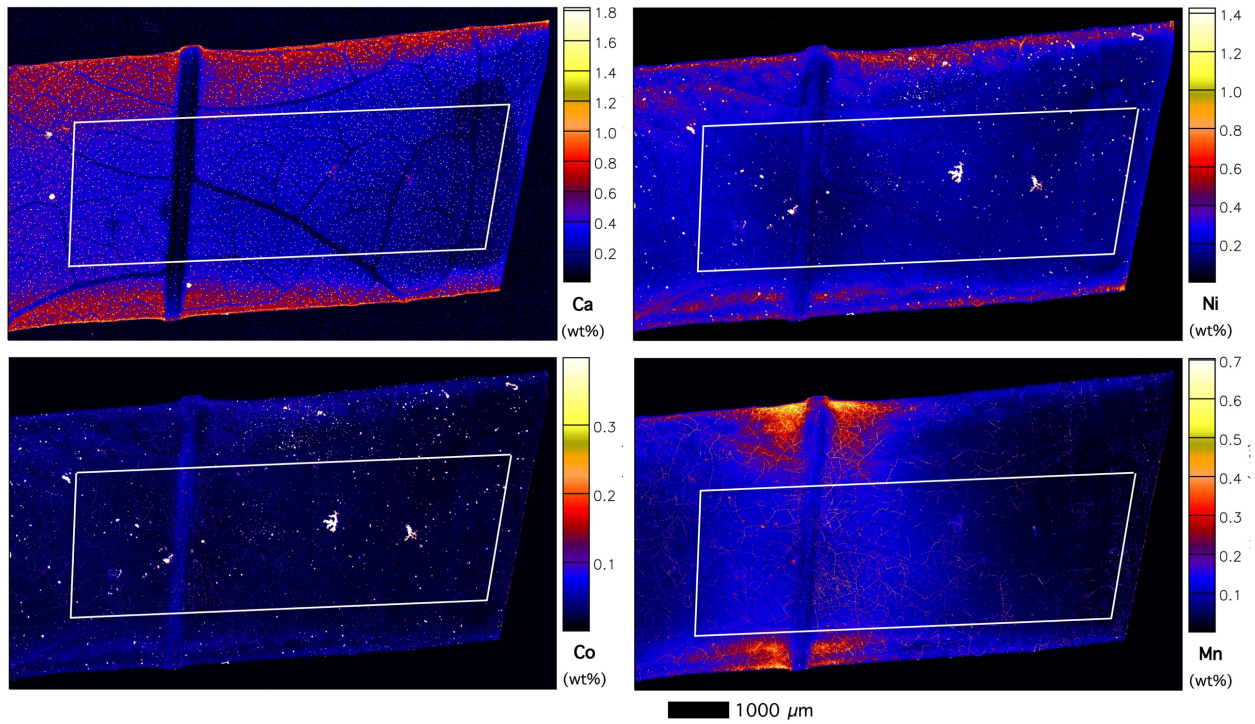

**Supplementary Figure 3.** Individual elemental  $\mu$ XRF maps of the same frozen-hydrated *Glochidion sericeum* foliar portion from Fig. 3–4 showing K, Ca, Mn, Ni, Zn and Br maps. Unclipped version of file, with the portion used for Fig. 3–4 outlined in white box. Scale bar 1000  $\mu$ m.

SUPPL FIG 4

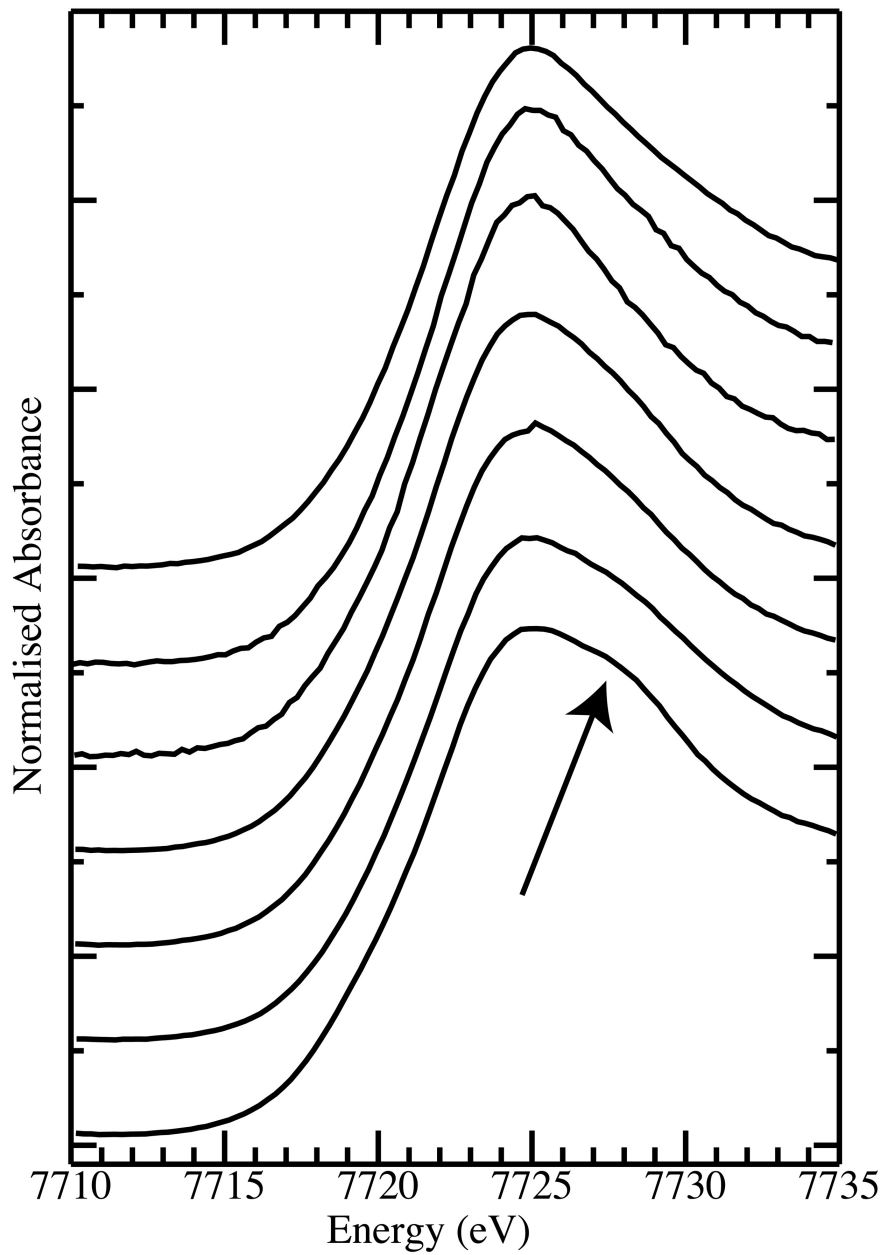

**Supplementary Figure 4.** Co K-edge X-ray spectra of different sample of *G. sericeum* tissues. The arrow shows a broadening of the peak in some cases with a shoulder occasionally evident on the high-energy side of the peak.

### SUPPL FIG 5

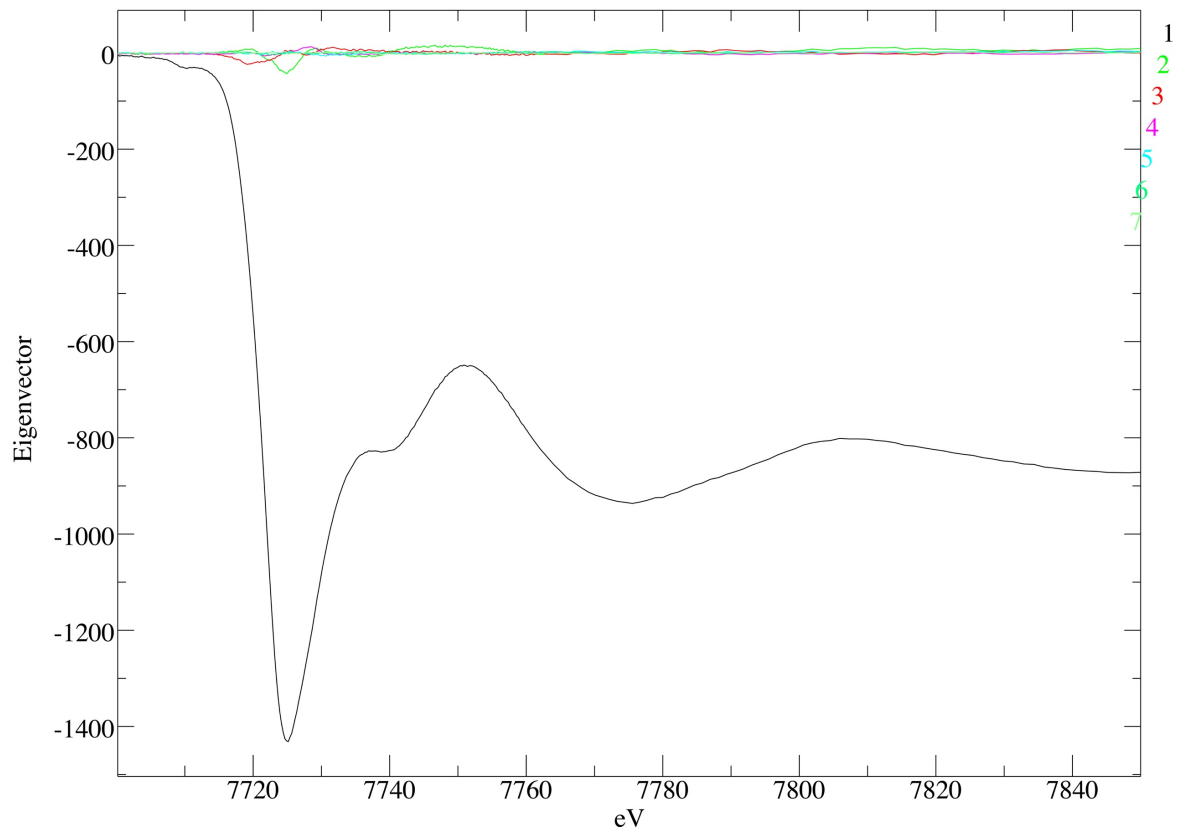

**Supplementary Figure 5.** Principal Component Analysis of Co K-edge X-ray spectra of different samples of *G. sericeum* leaves and other tissues show in Fig 8.

SUPPL FIG 6

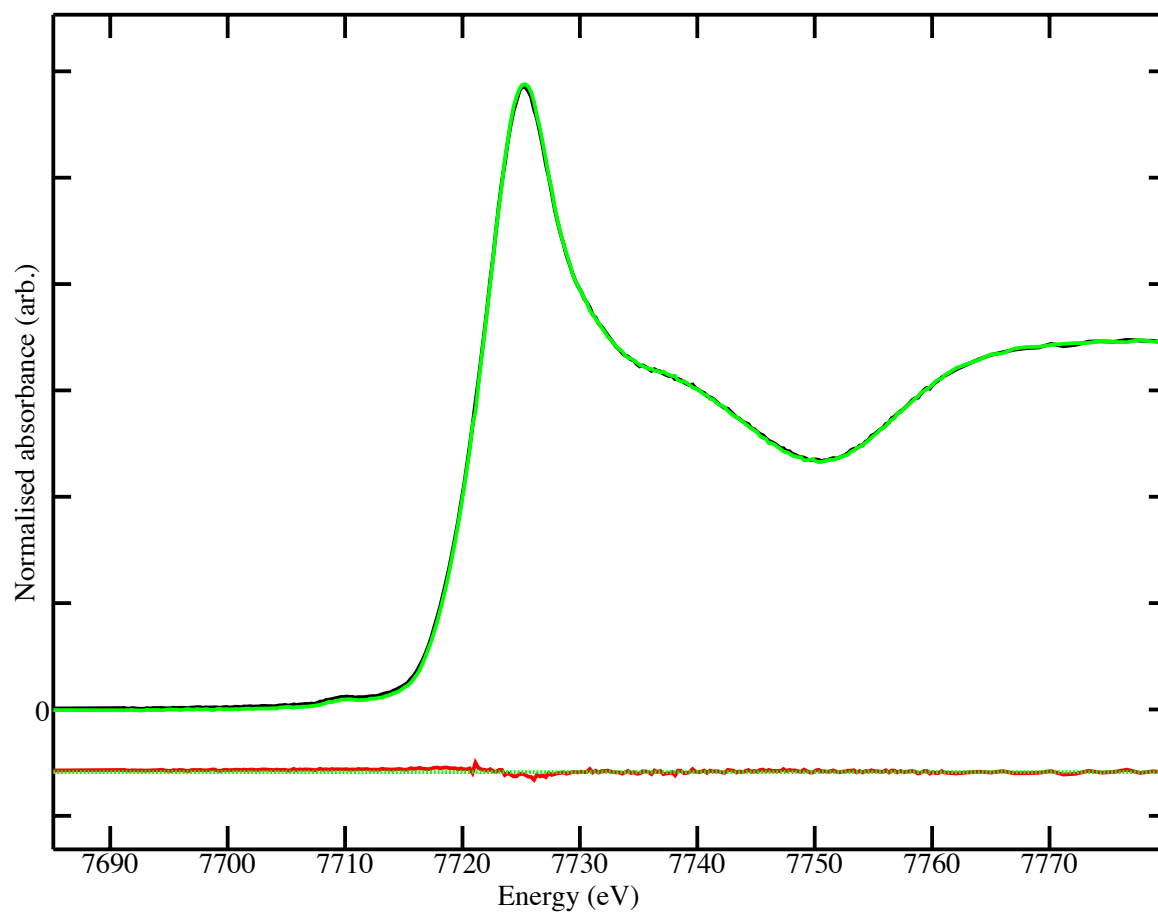

**Supplementary Figure 6.** Comparison of Co K-edge X-ray spectra. Co:tartrate is the black trace, Co:malate is the green trace and the residual is in red.

## SUPPL FIG 7

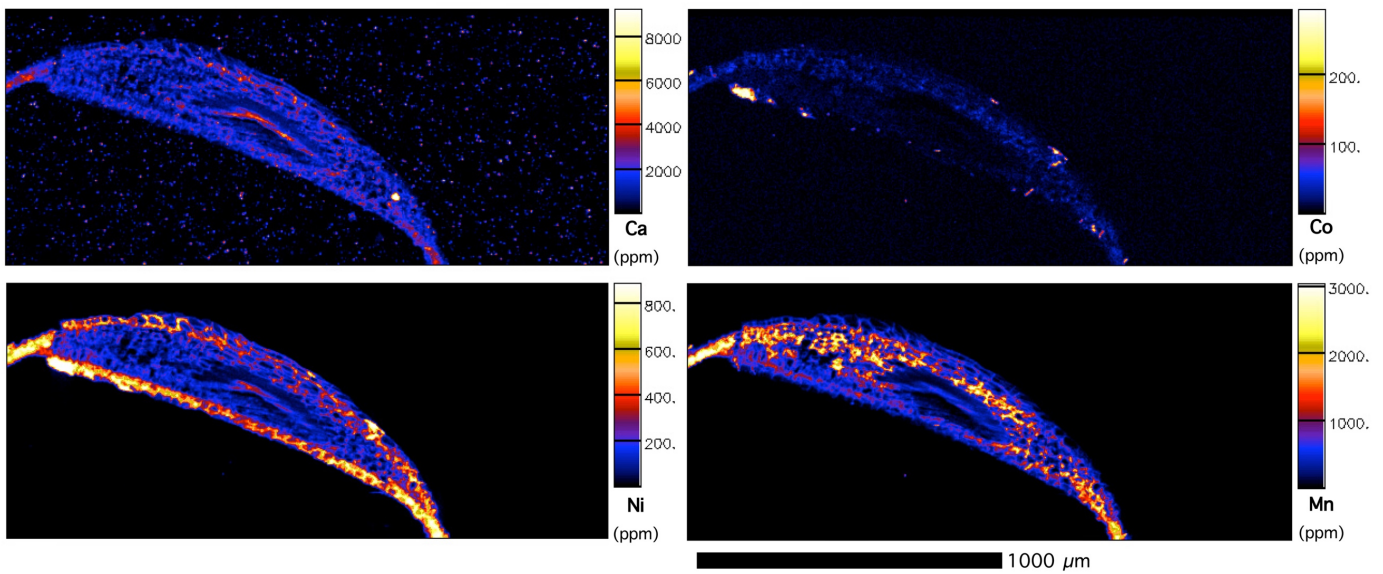

**Supplementary Figure 7.**  $\mu$ XRF image of a frozen-hydrated *Glochidion sericeum* leaf cross-section displaying elemental maps for Ca, Ni, Co and Mn. Area:  $2.00 \times 0.85$  mm, with a step size of  $1 \mu\text{m}$  and a per-pixel dwell of 1.30 ms. The maps were flattened to Compton map to correct for differences in sample thickness and density.



SUPPL TABLE 1

Herbarium XRF scanning data of *Glochidion* specimen collections in the Forest Research Centre Herbarium in Sepilok.

| Specimen herbarium reference | Co [XRF] mg kg <sup>-1</sup> | Co [corrected] mg kg <sup>-1</sup> | Ni XRF mg kg <sup>-1</sup> | Ni [corrected] mg kg <sup>-1</sup> | Genus             | Species            | Collector   | Date     | Area         | Locality        |
|------------------------------|------------------------------|------------------------------------|----------------------------|------------------------------------|-------------------|--------------------|-------------|----------|--------------|-----------------|
| SAN84627                     | <LOD                         | -                                  | <LOD                       | -                                  | <i>Glochidion</i> | <i>andersonii</i>  | Diwol S     | 26/1/77  | Papar        | Benoni          |
| SAN102559                    | <LOD                         | -                                  | <LOD                       | -                                  | <i>Glochidion</i> | <i>andersonii</i>  | Amin AAS    | 25/4/86  | Beaufort     | Binsulok FR     |
| SAN139006                    | <LOD                         | -                                  | <LOD                       | -                                  | <i>Glochidion</i> | <i>andersonii</i>  | Clement M   | 7/12/93  | Beluran      | Telupid         |
| SAN139534                    | 44                           | -                                  | <LOD                       | -                                  | <i>Glochidion</i> | <i>angulatum</i>   | Asik M      | 23/8/94  | Nabawan      | Pensiangan      |
| SAN90830                     | 47                           | -                                  | <LOD                       | -                                  | <i>Glochidion</i> | <i>angulatum</i>   | Madani L    | 9/6/79   | Tenom        | Tenom           |
| SAN153690                    | <LOD                         | -                                  | 8309                       | 9943                               | <i>Glochidion</i> | <i>angulatum</i>   | Suzana S    | 2/4/13   | Tongod       | GnTinkar FR     |
| SAN117350                    | <LOD                         | -                                  | <LOD                       | -                                  | <i>Glochidion</i> | <i>angulatum</i>   | Gambating A | 6/2/87   | Ranau        | Ranau           |
| SAN123480                    | <LOD                         | -                                  | <LOD                       | -                                  | <i>Glochidion</i> | <i>angulatum</i>   | Gambating A | 19/9/88  | Ranau        | Ranau           |
| SAN77139                     | <LOD                         | -                                  | <LOD                       | -                                  | <i>Glochidion</i> | <i>angulatum</i>   | Shea G      | 23/5/73  | Ranau        | Ranau           |
| SAN114450                    | <LOD                         | -                                  | <LOD                       | -                                  | <i>Glochidion</i> | <i>angulatum</i>   | Madani L    | 18/6/86  | Nabawan      | Sapulut         |
| SAN111670                    | <LOD                         | -                                  | <LOD                       | -                                  | <i>Glochidion</i> | <i>angulatum</i>   | Gambating A | 4/12/85  | Kinabatangan | Tangkulap       |
| SAN136910                    | 33                           | -                                  | <LOD                       | -                                  | <i>Glochidion</i> | <i>arborescens</i> | Sumbing J   | 24/1/94  | Nabawan      | Pensiangan FR   |
| SAN28641                     | 44                           | -                                  | <LOD                       | -                                  | <i>Glochidion</i> | <i>arborescens</i> | Bakar AH    | 8/12/61  | Tawau        | Quoin Hill FR   |
| SAN115885                    | 52                           | -                                  | <LOD                       | -                                  | <i>Glochidion</i> | <i>arborescens</i> | Fidilis K   | 29/5/86  | Nabawan      | Nabawan         |
| SAN121226                    | 63                           | -                                  | <LOD                       | -                                  | <i>Glochidion</i> | <i>arborescens</i> | Majawat G   | 10/5/87  | Pitas        | Paitan FR       |
| SAN29575                     | 90                           | -                                  | <LOD                       | -                                  | <i>Glochidion</i> | <i>arborescens</i> | Aban G      | 11/4/62  | Tawau        | Apas            |
| SAN27379                     | 96                           | -                                  | <LOD                       | -                                  | <i>Glochidion</i> | <i>arborescens</i> | Buntar A    | 25/10/61 | Tenom        | Mt. Mandalom FR |
| SAN107622                    | 108                          | -                                  | <LOD                       | -                                  | <i>Glochidion</i> | <i>arborescens</i> | Madani L    | 13/12/84 | Beluran      | Telupid         |
| SAN107592                    | 121                          | -                                  | 204                        | -                                  | <i>Glochidion</i> | <i>arborescens</i> | Madani L    | 7/12/84  | Beluran      | Telupid         |

|           |      |     |      |   |                   |                    |              |          |              |                   |
|-----------|------|-----|------|---|-------------------|--------------------|--------------|----------|--------------|-------------------|
| 35068     | 223  | 241 | <LOD | - | <i>Glochidion</i> | <i>arborescens</i> | Madani L     | 21/3/63  | Nabawan      | Pensiangan        |
| SAN113361 | <LOD | -   | <LOD | - | <i>Glochidion</i> | <i>arborescens</i> | Sumbing J    | 25/1/86  | Keningau     | Keningau          |
| SAN83103  | <LOD | -   | <LOD | - | <i>Glochidion</i> | <i>arborescens</i> | Lamb A       | 11/5/76  | Kinabatangan | Lamag             |
| SAN95629  | <LOD | -   | <LOD | - | <i>Glochidion</i> | <i>arborescens</i> | Fidilis K    | 17/1/83  | Tawau        | Luasong           |
| SAN96869  | <LOD | -   | <LOD | - | <i>Glochidion</i> | <i>arborescens</i> | Lee YF       | 5/9/83   | Sipitang     | Maligan           |
| SAN77085  | <LOD | -   | <LOD | - | <i>Glochidion</i> | <i>arborescens</i> | Free M       | 18/10/73 | Tawau        | Merutai           |
| SAN129968 | <LOD | -   | <LOD | - | <i>Glochidion</i> | <i>arborescens</i> | Fidilis K    | 21/5/92  | Nabawan      | Milian Labau FR   |
| 35074     | <LOD | -   | <LOD | - | <i>Glochidion</i> | <i>arborescens</i> | Madani L     | 21/3/63  | Nabawan      | Pensiangan        |
| SAN67244  | <LOD | -   | <LOD | - | <i>Glochidion</i> | <i>arborescens</i> | Sign G       | 29/8/84  | Kinabatangan | Pinangah          |
| SAN29466  | <LOD | -   | <LOD | - | <i>Glochidion</i> | <i>arborescens</i> | Meijer W     | 30/3/62  | Tawau        | Quoin Hill FR     |
| SAN141960 | <LOD | -   | <LOD | - | <i>Glochidion</i> | <i>arborescens</i> | Kulip J      | 21/6/97  | Lahad Datu   | Tabin FR          |
| SAN30098  | <LOD | -   | <LOD | - | <i>Glochidion</i> | <i>arborescens</i> | Singh J      | 23/5/62  | Tawau        | Tawau             |
| SAN103218 | <LOD | -   | <LOD | - | <i>Glochidion</i> | <i>arborescens</i> | Amin AAS     | 25/3/87  | Beaufort     | Weston            |
| 39066     | 45   | -   | <LOD | - | <i>Glochidion</i> | <i>borneense</i>   | Arshid T     | 25/11/64 | Sandakan     | Sandakan          |
| 46526     | 287  | 263 | 177  | - | <i>Glochidion</i> | <i>borneense</i>   | Mikil G      | 9/8/64   | Ranau        | Ranau             |
| SAN115430 | <LOD | -   | <LOD | - | <i>Glochidion</i> | <i>borneense</i>   | Amin AAS     | 15/6/88  | Beaufort     | Beaufort          |
| SAN123524 | <LOD | -   | <LOD | - | <i>Glochidion</i> | <i>borneense</i>   | Gambating A  | 3/9/88   | Ranau        | Mesilau           |
| 38344     | <LOD | -   | <LOD | - | <i>Glochidion</i> | <i>borneense</i>   | Sinanggul HT | 11/7/63  | Ranau        | Ranau             |
| SAN23008  | <LOD | -   | <LOD | - | <i>Glochidion</i> | <i>borneense</i>   | Meijer W     | 20/10/60 | Kinabatangan | Sg Kapur FR       |
| 56923     | <LOD | -   | <LOD | - | <i>Glochidion</i> | <i>borneense</i>   | Meijer W     | 23/1/67  | Lahad Datu   | Silam             |
| SAN69463  | 43   | -   | <LOD | - | <i>Glochidion</i> | <i>brunneum</i>    | Amin AAS     | 12/1/85  | Beluran      | Beluran           |
| SAN84573  | <LOD | -   | <LOD | - | <i>Glochidion</i> | <i>brunneum</i>    | Talib B      | 24/11/76 | Beaufort     | Bukau             |
| SAN84502  | <LOD | -   | <LOD | - | <i>Glochidion</i> | <i>brunneum</i>    | Talib B      | 20/10/76 | Beaufort     | Lumat             |
| SAN80684  | <LOD | -   | <LOD | - | <i>Glochidion</i> | <i>brunneum</i>    | Talib B      | 21/7/76  | Papar        | Mandahan          |
| SAN129536 | <LOD | -   | <LOD | - | <i>Glochidion</i> | <i>brunneum</i>    | Diwol S      | 15/1/90  | Lahad Datu   | Tabin FR          |
| SAN107345 | <LOD | -   | <LOD | - | <i>Glochidion</i> | <i>brunneum</i>    | Gambating A  | 17/11/84 | Beluran      | Ulu Sapa Payau FR |
| SAN124666 | 62   | -   | <LOD | - | <i>Glochidion</i> | <i>calospermum</i> | Diwol S      | 26/5/88  | Kinabatangan | Tangkulap FR      |

|           |      |     |      |      |                   |                     |               |          |               |               |
|-----------|------|-----|------|------|-------------------|---------------------|---------------|----------|---------------|---------------|
| SAN32387  | 73   | -   | <LOD | -    | <i>Glochidion</i> | <i>calospermum</i>  | Badak P       | 18/11/62 | Ranau         | Sosopodon FR  |
| 48429     | 84   | -   | <LOD | -    | <i>Glochidion</i> | <i>calospermum</i>  | Singh J       | 13/1/65  | Sandakan      | Beluran       |
| SAN28034  | 136  | -   | <LOD | -    | <i>Glochidion</i> | <i>calospermum</i>  | Carson GL     | 1/1/62   | Ranau         | Ranau         |
| SAN28688  | <LOD | -   | <LOD | -    | <i>Glochidion</i> | <i>calospermum</i>  | Meijer W      | 12/12/61 | Tawau         | Balung        |
| SAN102604 | <LOD | -   | <LOD | -    | <i>Glochidion</i> | <i>calospermum</i>  | Amin AAS      | 19/6/86  | Beaufort      | Beaufort      |
| SAN131024 | <LOD | -   | <LOD | -    | <i>Glochidion</i> | <i>calospermum</i>  | Kulip J       | 20/2/91  | Beluran       | Bidu Bidu FR  |
| SAN137118 | <LOD | -   | <LOD | -    | <i>Glochidion</i> | <i>calospermum</i>  | Kuntil L      | 4/2/93   | Beluran       | Bidu Bidu FR  |
| SAN149912 | <LOD | -   | <LOD | -    | <i>Glochidion</i> | <i>calospermum</i>  | Joel D        | 26/11/08 | Beluran       | Kuamas FR     |
| SAN152642 | <LOD | -   | <LOD | -    | <i>Glochidion</i> | <i>calospermum</i>  | Sugau JB      | 5/7/12   | Kinabatangan  | Kuamut FR     |
| 254       | <LOD | -   | <LOD | -    | <i>Glochidion</i> | <i>calospermum</i>  | Ming KJ       | 26/4/00  | Kinabatangan  | MaliauBasin   |
| SAN116401 | <LOD | -   | <LOD | -    | <i>Glochidion</i> | <i>calospermum</i>  | Gambating A   | 15/10/86 | Ranau         | Ranau         |
| SAN105316 | <LOD | -   | <LOD | -    | <i>Glochidion</i> | <i>calospermum</i>  | Fidilis K     | 14/7/84  | Nabawan       | Sapulut       |
| 33720     | <LOD | -   | <LOD | -    | <i>Glochidion</i> | <i>calospermum</i>  | Putan S       | 7/1/63   | Ranau         | Sosopodon FR  |
| 77073     | <LOD | -   | <LOD | -    | <i>Glochidion</i> | <i>calospermum</i>  | Free M        | 11/10/73 | Tawau         | Tawau         |
| SAN124776 | <LOD | -   | <LOD | -    | <i>Glochidion</i> | <i>calospermum</i>  | Kulip J       | 19/2/90  | Ranau         | Trus Madi FR  |
| SAN79118  | <LOD | -   | <LOD | -    | <i>Glochidion</i> | <i>calospermum</i>  | Free M        | 14/8/75  | Kinabatangan  | Ulu Segama FR |
| SNP 27152 | 1059 | 523 | 3754 | 5053 | <i>Glochidion</i> | <i>cf. sericeum</i> | Van der Ent A | 24/3/10  | Kinabalu Park | Serinsim      |
| SNP 27152 | 1087 | 532 | 3942 | 5255 | <i>Glochidion</i> | <i>cf. sericeum</i> | Van der Ent A | 24/3/10  | Kinabalu Park | Serinsim      |
| SNP 27152 | 1137 | 549 | 3259 | 4521 | <i>Glochidion</i> | <i>cf. sericeum</i> | Van der Ent A | 24/3/10  | Kinabalu Park | Serinsim      |
| SNP 27152 | 1143 | 551 | 2046 | 3219 | <i>Glochidion</i> | <i>cf. sericeum</i> | Van der Ent A | 24/3/10  | Kinabalu Park | Serinsim      |
| SNP 27152 | 1202 | 571 | 2015 | 3185 | <i>Glochidion</i> | <i>cf. sericeum</i> | Van der Ent A | 24/3/10  | Kinabalu Park | Serinsim      |
| SNP 27152 | 1351 | 621 | 2398 | 3597 | <i>Glochidion</i> | <i>cf. sericeum</i> | Van der Ent A | 24/3/10  | Kinabalu Park | Serinsim      |
| SNP 27152 | 1363 | 625 | 2479 | 3683 | <i>Glochidion</i> | <i>cf. sericeum</i> | Van der Ent A | 24/3/10  | Kinabalu Park | Serinsim      |
| SNP 27152 | 1554 | 690 | 2679 | 3898 | <i>Glochidion</i> | <i>cf. sericeum</i> | Van der Ent A | 24/3/10  | Kinabalu Park | Serinsim      |
| SNP 27152 | 1575 | 697 | 2824 | 4054 | <i>Glochidion</i> | <i>cf. sericeum</i> | Van der Ent A | 24/3/10  | Kinabalu Park | Serinsim      |
| SNP 27152 | 1604 | 706 | 3042 | 4288 | <i>Glochidion</i> | <i>cf. sericeum</i> | Van der Ent A | 24/3/10  | Kinabalu Park | Serinsim      |
| SNP 27152 | 1604 | 706 | 2799 | 4027 | <i>Glochidion</i> | <i>cf. sericeum</i> | Van der Ent A | 24/3/10  | Kinabalu Park | Serinsim      |

|           |      |     |      |      |                   |                     |               |          |               |               |
|-----------|------|-----|------|------|-------------------|---------------------|---------------|----------|---------------|---------------|
| SNP 27152 | 1641 | 719 | 2994 | 4237 | <i>Glochidion</i> | <i>cf. sericeum</i> | Van der Ent A | 24/3/10  | Kinabalu Park | Serinsim      |
| SNP 27152 | 1715 | 744 | 3307 | 4572 | <i>Glochidion</i> | <i>cf. sericeum</i> | Van der Ent A | 24/3/10  | Kinabalu Park | Serinsim      |
| SNP 27152 | 1721 | 746 | 3116 | 4368 | <i>Glochidion</i> | <i>cf. sericeum</i> | Van der Ent A | 24/3/10  | Kinabalu Park | Serinsim      |
| SNP 27152 | 1792 | 770 | 3269 | 4532 | <i>Glochidion</i> | <i>cf. sericeum</i> | Van der Ent A | 24/3/10  | Kinabalu Park | Serinsim      |
| SNP 27144 | 1821 | 779 | 2858 | 4090 | <i>Glochidion</i> | <i>cf. sericeum</i> | Van der Ent A | 24/3/10  | Kinabalu Park | Serinsim      |
| SNP 27152 | 1942 | 820 | 3564 | 4848 | <i>Glochidion</i> | <i>cf. sericeum</i> | Van der Ent A | 24/3/10  | Kinabalu Park | Serinsim      |
| SNP 27152 | 2092 | 871 | 7025 | 8564 | <i>Glochidion</i> | <i>cf. sericeum</i> | Van der Ent A | 24/3/10  | Kinabalu Park | Serinsim      |
| SNP 27152 | 2329 | 951 | 4003 | 5320 | <i>Glochidion</i> | <i>cf. sericeum</i> | Van der Ent A | 24/3/10  | Kinabalu Park | Serinsim      |
| SAN85091  | 43   | -   | <LOD | -    | <i>Glochidion</i> | <i>elmeri</i>       | Cockburn PF   | 26/8/76  | Lahad Datu    | Danum Valley  |
| SAN116799 | 57   | -   | 61   | -    | <i>Glochidion</i> | <i>elmeri</i>       | Mansus S      | 23/6/86  | Beluran       | Sg Sap iFR    |
| SAN99718  | 62   | -   | 582  | 1647 | <i>Glochidion</i> | <i>elmeri</i>       | Sign G        | 26/7/83  | Kinabatangan  | Maliau Basin  |
| SAN97302  | 66   | -   | <LOD | -    | <i>Glochidion</i> | <i>elmeri</i>       | Diwol S       | 19/6/83  | Kinabatangan  | Tongod        |
| SAN110199 | 66   | -   | 50   | -    | <i>Glochidion</i> | <i>elmeri</i>       | Sumbing J     | 18/9/85  | Kinabatangan  | Pinangah      |
| SAN115826 | 84   | -   | <LOD | -    | <i>Glochidion</i> | <i>elmeri</i>       | Sumbing J     | 23/5/86  | Nabawan       | Nabawan       |
| SAN116203 | 99   | -   | <LOD | -    | <i>Glochidion</i> | <i>elmeri</i>       | Gambating A   | 27/8/86  | Ranau         | Ranau         |
| 39922     | 99   | -   | <LOD | -    | <i>Glochidion</i> | <i>elmeri</i>       | Sinanggul HT  | 10/10/63 | Lahad Datu    | Silabukan FR  |
| SAN90479  | 106  | -   | <LOD | -    | <i>Glochidion</i> | <i>elmeri</i>       | Aban G        |          | Beluran       | Beluran       |
| SAN82250  | 122  | -   | <LOD | -    | <i>Glochidion</i> | <i>elmeri</i>       | Fidilis K     | 19/3/77  | Tawau         | Luasong       |
| 47741     | 132  | -   | <LOD | -    | <i>Glochidion</i> | <i>elmeri</i>       | Nordin G      | 16/11/64 | Tawau         | Apas          |
| SAN97000  | 160  | -   | 445  | 1500 | <i>Glochidion</i> | <i>elmeri</i>       | Diwol S       | 14/6/83  | Kinabatangan  | Tongod        |
| SAN85706  | 182  | 227 | <LOD | -    | <i>Glochidion</i> | <i>elmeri</i>       | Talip AH      | 15/6/77  | Sandakan      | Beluran       |
| SAN97442  | 202  | 234 | 674  | 1746 | <i>Glochidion</i> | <i>elmeri</i>       | Gambating A   | 29/6/83  | Kinabatangan  | Lamag         |
| SAN116774 | 208  | 236 | <LOD | -    | <i>Glochidion</i> | <i>elmeri</i>       | Sam PP        | 18/6/86  | Beluran       | Lung Manis    |
| SAN97000  | 229  | 243 | 470  | 1527 | <i>Glochidion</i> | <i>elmeri</i>       | Diwol S       | 14/6/83  | Kinabatangan  | Tongod        |
| SAN30598  | 1107 | 539 | 232  | -    | <i>Glochidion</i> | <i>elmeri</i>       | Aban G        | 31/7/62  | Tawau         | Kalabakan     |
| SAN108910 | <LOD | -   | 149  | -    | <i>Glochidion</i> | <i>elmeri</i>       | Madani L      | 8/7/85   | Kinabatangan  | Ulu Segama FR |
| SAN74952  | <LOD | -   | <LOD | -    | <i>Glochidion</i> | <i>elmeri</i>       | Diwol S       | 11/12/71 | Beluran       | Beluran       |

|           |      |   |      |   |                   |                     |              |          |              |                    |
|-----------|------|---|------|---|-------------------|---------------------|--------------|----------|--------------|--------------------|
| SAN75573  | <LOD | - | <LOD | - | <i>Glochidion</i> | <i>elmeri</i>       | Kumin M      | 13/9/72  | Beluran      | Beluran            |
| 38804     | <LOD | - | <LOD | - | <i>Glochidion</i> | <i>elmeri</i>       | Agam A       | 23/8/63  | Beluran      | Beluran            |
| jd6335    | <LOD | - | <LOD | - | <i>Glochidion</i> | <i>elmeri</i>       | Dransfield J | 28/2/86  | Lahad Datu   | Danum Valley       |
| SAN96713  | <LOD | - | <LOD | - | <i>Glochidion</i> | <i>elmeri</i>       | Gambating A  | 20/5/83  | Kinabatangan | Kretam FR          |
| SAN33439  | <LOD | - | <LOD | - | <i>Glochidion</i> | <i>elmeri</i>       | Chai M       | 2/3/63   | Lahad Datu   | Lahad Datu         |
| SAN28774  | <LOD | - | <LOD | - | <i>Glochidion</i> | <i>elmeri</i>       | Lajangah JK  | 26/1/62  | Ranau        | Lohan              |
| SAN121302 | <LOD | - | <LOD | - | <i>Glochidion</i> | <i>elmeri</i>       | Kalantas A   | 12/5/87  | Pitas        | Piyas              |
| SAN102435 | <LOD | - | <LOD | - | <i>Glochidion</i> | <i>elmeri</i>       | Majawat G    | 12/10/88 | Beluran      | Segaliud Lokan FR  |
| SAN81439  | <LOD | - | <LOD | - | <i>Glochidion</i> | <i>elmeri</i>       | Madani L     | 12/3/75  | Beluran      | Segaliud Lokan FR  |
| SAN81439  | <LOD | - | <LOD | - | <i>Glochidion</i> | <i>elmeri</i>       | Madani L     | 12/3/75  | Beluran      | Segaliud Lokan FR  |
| 37433     | <LOD | - | <LOD | - | <i>Glochidion</i> | <i>elmeri</i>       | Sayu E       | 22/7/63  | Beluran      | Sg SapiFR          |
| SAN88299  | <LOD | - | <LOD | - | <i>Glochidion</i> | <i>elmeri</i>       | Fidilis K    | 23/2/78  | Tawau        | Tawau Hill Park FR |
| SAN55931  | <LOD | - | <LOD | - | <i>Glochidion</i> | <i>elmeri</i>       | Nawi AR      | 6/12/83  | Kinabatangan | Tongod             |
| 42911     | <LOD | - | 51   | - | <i>Glochidion</i> | <i>glomerulatum</i> | Masirum R    | 18/3/64  | Lahad Datu   | Silabukan FR       |
| SAN127641 | <LOD | - | <LOD | - | <i>Glochidion</i> | <i>glomerulatum</i> | Asik M       | 21/6/89  | Nabawan      | Bkt Pisagan        |
| SAN81278  | <LOD | - | <LOD | - | <i>Glochidion</i> | <i>glomerulatum</i> | Arshid T     | 18/2/75  | Sandakan     | Gum-Gum FR         |
| SAN103683 | <LOD | - | <LOD | - | <i>Glochidion</i> | <i>glomerulatum</i> | Matin P      | 21/5/84  | Tawau        | Kalabakan          |
| SAN102670 | <LOD | - | <LOD | - | <i>Glochidion</i> | <i>glomerulatum</i> | Amin AAS     | 19/8/86  | Sipitang     | Mendolong          |
| SAN121166 | <LOD | - | <LOD | - | <i>Glochidion</i> | <i>glomerulatum</i> | Gambating A  | 19/11/87 | Ranau        | Ranau              |
| SAN129111 | <LOD | - | <LOD | - | <i>Glochidion</i> | <i>glomerulatum</i> | Soinin S     | 27/7/87  | Ranau        | Ranau              |
| SAN105339 | <LOD | - | <LOD | - | <i>Glochidion</i> | <i>glomerulatum</i> | Sumbing J    | 18/7/84  | Nabawan      | Sapulut            |
| SAN116824 | <LOD | - | <LOD | - | <i>Glochidion</i> | <i>glomerulatum</i> | Suin G       | 25/6/86  | Beluran      | Sg Sapi FR         |
| SAN140657 | <LOD | - | <LOD | - | <i>Glochidion</i> | <i>glomerulatum</i> | Nasrah Y     | 26/1/96  | Beluran      | Sg Sapi FR         |
| SAN115536 | <LOD | - | <LOD | - | <i>Glochidion</i> | <i>glomerulatum</i> | Amin AAS     | 10/2/88  | Beaufort     | Siaungau FR        |
| SAN106149 | <LOD | - | <LOD | - | <i>Glochidion</i> | <i>glomerulatum</i> | Amin AAS     | 23/9/91  | Sipitang     | Sipitang           |
| SAN81030  | <LOD | - | <LOD | - | <i>Glochidion</i> | <i>glomerulatum</i> | Aban G       | 10/12/74 | Ranau        | Tampias            |
| SAN149855 | <LOD | - | <LOD | - | <i>Glochidion</i> | <i>glomerulatum</i> | Ubaldu M     | 18/11/08 | Beluran      | TawaiFR            |

|           |      |   |      |   |                   |                     |              |          |            |                 |
|-----------|------|---|------|---|-------------------|---------------------|--------------|----------|------------|-----------------|
| SAN107572 | <LOD | - | <LOD | - | <i>Glochidion</i> | <i>glomerulatum</i> | Madani L     | 6/12/84  | Beluran    | Telupid         |
| 107572    | <LOD | - | <LOD | - | <i>Glochidion</i> | <i>glomerulatum</i> | Madani L     | 6/12/84  | Beluran    | Telupid         |
| SAN120183 | <LOD | - | <LOD | - | <i>Glochidion</i> | <i>glomerulatum</i> | Fidilis K    | 18/3/87  | Tenom      | Tenom           |
| SAN66797  | <LOD | - | <LOD | - | <i>Glochidion</i> | <i>insignis</i>     | Aban G       | 20/4/70  | Tenom      | Tenom           |
| 38827     | <LOD | - | <LOD | - | <i>Glochidion</i> | <i>kerangae</i>     | Sayu E       | 1/10/63  | Sandakan   | BatuSapi        |
| SAN126437 | <LOD | - | <LOD | - | <i>Glochidion</i> | <i>kerangae</i>     | Amin AAS     | 13/3/91  | Beaufort   | Haligolat       |
| SAN103048 | <LOD | - | <LOD | - | <i>Glochidion</i> | <i>kerangae</i>     | Amin AAS     | 23/2/86  | KualaPenyu | Kuala Penyu     |
| SAN126466 | <LOD | - | <LOD | - | <i>Glochidion</i> | <i>kerangae</i>     | Amin AAS     | 23/7/92  | KualaPenyu | Kuala Penyu     |
| SAN80421  | <LOD | - | <LOD | - | <i>Glochidion</i> | <i>kerangae</i>     | Diwol S      | 9/3/76   | KualaPenyu | Kuala Penyu     |
| SAN74163  | <LOD | - | <LOD | - | <i>Glochidion</i> | <i>kerangae</i>     | Kumin M      | 18/8/71  | Sandakan   | Leila FR        |
| 43353     | <LOD | - | <LOD | - | <i>Glochidion</i> | <i>kerangae</i>     | Meijer W     | 6/1/65   | Sandakan   | Leila FR        |
| 43418     | <LOD | - | <LOD | - | <i>Glochidion</i> | <i>kerangae</i>     | Pereira WJ   | 30/4/64  | Sandakan   | Leila FR        |
| 47345     | <LOD | - | <LOD | - | <i>Glochidion</i> | <i>kerangae</i>     | Meijer W     | 3/5/65   | Sandakan   | Leila FR        |
| SAN27957  | <LOD | - | <LOD | - | <i>Glochidion</i> | <i>kerangae</i>     | Thaufeck MR  | 28/11/61 | Sipitang   | Mesapol         |
| SAN105962 | <LOD | - | <LOD | - | <i>Glochidion</i> | <i>kerangae</i>     | Amin AAS     | 18/7/91  | Beaufort   | Siaungau FR     |
| SAN21804  | <LOD | - | <LOD | - | <i>Glochidion</i> | <i>kerangae</i>     | Meijer W     | 21/6/60  | Sipitang   | Sipitang        |
| SAN103242 | <LOD | - | <LOD | - | <i>Glochidion</i> | <i>kerangae</i>     | Amin AAS     | 27/3/87  | Beaufort   | Weston          |
| SAN150270 | <LOD | - | <LOD | - | <i>Glochidion</i> | <i>laevigatum</i>   | Suzana S     | 5/4/13   | Tongod     | Gn Tinkar FR    |
| 55-19     | <LOD | - | <LOD | - | <i>Glochidion</i> | <i>laevigatum</i>   | AgriRCTuaran | 6/9/65   | Tuaran     | Mengkabong      |
| SAN71100  | 45   | - | <LOD | - | <i>Glochidion</i> | <i>lanceifolium</i> | Kumin M      | 25/7/70  | Lahad Datu | Lahad Datu      |
| SAN35905  | 91   | - | <LOD | - | <i>Glochidion</i> | <i>lanceifolium</i> | Aban G       | 26/4/63  | Tawau      | Gading          |
| 31490     | <LOD | - | 47   | - | <i>Glochidion</i> | <i>lanceifolium</i> | Agam A       | 19/5/63  | Lahad Datu | Silam           |
| 771987    | <LOD | - | 63   | - | <i>Glochidion</i> | <i>lanceifolium</i> | Argent G     | 12/3/87  | Lahad Datu | Danum Valley    |
| SAN111026 | <LOD | - | <LOD | - | <i>Glochidion</i> | <i>lanceifolium</i> | Gambating A  | 27/8/85  | Beluran    | Beluran         |
| SAN91100  | <LOD | - | <LOD | - | <i>Glochidion</i> | <i>lanceifolium</i> | Diwol S      | 14/12/79 | Beluran    | Beluran         |
| 111026    | <LOD | - | <LOD | - | <i>Glochidion</i> | <i>lanceifolium</i> | Gambating A  | 27/8/85  | Beluran    | Beluran         |
| SAN108117 | <LOD | - | <LOD | - | <i>Glochidion</i> | <i>lanceifolium</i> | Gambating A  | 18/2/85  | Sandakan   | Gomantong Caves |

|           |      |   |      |   |                   |                      |              |          |              |                   |
|-----------|------|---|------|---|-------------------|----------------------|--------------|----------|--------------|-------------------|
| SAN64847  | <LOD | - | <LOD | - | <i>Glochidion</i> | <i>lanceifolium</i>  | Aban G       | 21/11/83 | Nabawan      | Nabawan           |
| SAN110280 | <LOD | - | <LOD | - | <i>Glochidion</i> | <i>lanceifolium</i>  | Asik M       | 25/9/85  | Kinabatangan | Pinangah          |
| 55351     | <LOD | - | <LOD | - | <i>Glochidion</i> | <i>lanceifolium</i>  | Aban G       | 4/4/66   | Lahad Datu   | Silam             |
| 35010     | <LOD | - | <LOD | - | <i>Glochidion</i> | <i>lanceilimum</i>   | Madani L     | 9/3/63   | Keningau     | Keningau          |
| 33680     | <LOD | - | <LOD | - | <i>Glochidion</i> | <i>lanceilimum</i>   | Mujin MA     | 31/3/63  | KotaBelud    | Lemaas FR         |
| 55723     | <LOD | - | <LOD | - | <i>Glochidion</i> | <i>lanceilimum</i>   | Binideh RP   | 29/4/68  | Tenom        | Tomani            |
| SAN96827  | 52   | - | <LOD | - | <i>Glochidion</i> | <i>lanceisepalum</i> | Aban G       | 27/5/83  | Sandakan     | Sepilok Kabili FR |
| SAN73411  | 55   | - | <LOD | - | <i>Glochidion</i> | <i>lanceisepalum</i> | Shea G       | 15/11/71 | Keningau     | Keningau          |
| 52546     | 68   | - | <LOD | - | <i>Glochidion</i> | <i>lanceisepalum</i> | Talip AH     | 31/7/65  | Lahad Datu   | Lahad Datu        |
| SAN32266  | <LOD | - | <LOD | - | <i>Glochidion</i> | <i>lanceisepalum</i> | Lajangah JK  | 18/10/62 | Beaufort     | Beaufort          |
| SAN112326 | <LOD | - | <LOD | - | <i>Glochidion</i> | <i>lanceisepalum</i> | Campbell EJF | 22/6/86  | Lahad Datu   | Danum Valley      |
| SAN123723 | <LOD | - | <LOD | - | <i>Glochidion</i> | <i>lanceisepalum</i> | Majawat G    | 14/3/88  | Lahad Datu   | Danum Valley      |
| SAN82393  | <LOD | - | <LOD | - | <i>Glochidion</i> | <i>lanceisepalum</i> | Saikheh L    | 20/10/75 | Kudat        | Kudat             |
| SAN108228 | <LOD | - | <LOD | - | <i>Glochidion</i> | <i>lanceisepalum</i> | Argent G     | 25/2/85  | Lahad Datu   | Lahad Datu        |
| SAN118459 | <LOD | - | <LOD | - | <i>Glochidion</i> | <i>lanceisepalum</i> | Fidilis K    | 22/10/86 | Keningau     | Lanas             |
| SAN89737  | <LOD | - | <LOD | - | <i>Glochidion</i> | <i>lanceisepalum</i> | Fidilis K    | 22/2/79  | Tawau        | Luasong           |
| SAN104303 | <LOD | - | <LOD | - | <i>Glochidion</i> | <i>lanceisepalum</i> | Fidilis K    | 18/5/87  | Nabawan      | Nabawan           |
| SAN83840  | <LOD | - | <LOD | - | <i>Glochidion</i> | <i>lanceisepalum</i> | Diwol S      | 14/8/76  | Nabawan      | Nabawan           |
| SAN109244 | <LOD | - | <LOD | - | <i>Glochidion</i> | <i>lanceisepalum</i> | Mansus S     | 6/6/85   | Kinabatangan | Pinangah          |
| SAN116847 | <LOD | - | <LOD | - | <i>Glochidion</i> | <i>lanceisepalum</i> | Martin G     | 30/6/86  | Beluran      | Segaliud Lokan FR |
| SAN85364  | <LOD | - | <LOD | - | <i>Glochidion</i> | <i>lanceisepalum</i> | Fidilis K    | 11/2/77  | Tawau        | Tawau             |
| SAN108884 | <LOD | - | <LOD | - | <i>Glochidion</i> | <i>lanceisepalum</i> | Madani L     | 15/4/85  | Kinabatangan | Ulu Segama FR     |
| SAN95270  | <LOD | - | <LOD | - | <i>Glochidion</i> | <i>lanceisepalum</i> | Gambating A  | 5/4/83   | Ranau        | Ulu Tungud FR     |
| 36-37     | 37   | - | <LOD | - | <i>Glochidion</i> | <i>littorale</i>     | AgriRCTuaran | 6/9/65   | Tuaran       | Mengkabong        |
| SAN107450 | 45   | - | <LOD | - | <i>Glochidion</i> | <i>littorale</i>     | Ismail AAP   | 16/11/84 | Beluran      | Ulu Sg Muanod     |
| 59-9      | 52   | - | <LOD | - | <i>Glochidion</i> | <i>littorale</i>     | AgriRCTuaran | 6/9/65   | Tuaran       | Mengkabong        |
| 59-12     | 52   | - | <LOD | - | <i>Glochidion</i> | <i>littorale</i>     | AgriRCTuaran | 6/9/65   | Tuaran       | Mengkabong        |

|           |      |   |      |   |                   |                  |              |          |              |               |
|-----------|------|---|------|---|-------------------|------------------|--------------|----------|--------------|---------------|
| SAN109951 | 57   | - | <LOD | - | <i>Glochidion</i> | <i>littorale</i> | Asik M       | 9/8/85   | Nabawan      | Nabawan       |
| SAN123464 | 64   | - | 107  | - | <i>Glochidion</i> | <i>littorale</i> | Gambating A  | 12/9/88  | Ranau        | Mesilau       |
| SAN102148 | <LOD | - | <LOD | - | <i>Glochidion</i> | <i>littorale</i> | Lee YF       | 6/10/84  | Beluran      | Beluran       |
| SAN84629  | <LOD | - | <LOD | - | <i>Glochidion</i> | <i>littorale</i> | Diwol S      | 26/1/77  | Papar        | Benoni        |
| SAN98771  | <LOD | - | <LOD | - | <i>Glochidion</i> | <i>littorale</i> | Amin AAS     | 22/7/93  | Beaufort     | Binsulok      |
| SAN104141 | <LOD | - | <LOD | - | <i>Glochidion</i> | <i>littorale</i> | Amin AAS     | 20/2/92  | Beaufort     | Binsulok FR   |
| SAN114762 | <LOD | - | <LOD | - | <i>Glochidion</i> | <i>littorale</i> | Amin AAS     | 15/1/88  | Beaufort     | Binsulok FR   |
| SAN35488  | <LOD | - | <LOD | - | <i>Glochidion</i> | <i>littorale</i> | Ahwing J     | 9/4/63   | Kinabatangan | Dagat         |
| SAN88486  | <LOD | - | <LOD | - | <i>Glochidion</i> | <i>littorale</i> | Fidilis K    | 27/9/78  | Tawau        | Kalabakan     |
| SAN103445 | <LOD | - | <LOD | - | <i>Glochidion</i> | <i>littorale</i> | Amin AAS     | 17/6/87  | KualaPenyu   | Kuala Penyu   |
| SAN114971 | <LOD | - | <LOD | - | <i>Glochidion</i> | <i>littorale</i> | Amin AAS     | 28/2/88  | KualaPenyu   | Kuala Penyu   |
| SAN126491 | <LOD | - | <LOD | - | <i>Glochidion</i> | <i>littorale</i> | Amin AAS     | 27/7/92  | KualaPenyu   | Kuala Penyu   |
| SAN66262  | <LOD | - | <LOD | - | <i>Glochidion</i> | <i>littorale</i> | Cockburn PF  | 11/6/69  | KualaPenyu   | Kuala Penyu   |
| 35782     | <LOD | - | <LOD | - | <i>Glochidion</i> | <i>littorale</i> | Mikil G      | 1/4/63   | Sandakan     | Labuk Road FR |
| SAN94431  | <LOD | - | <LOD | - | <i>Glochidion</i> | <i>littorale</i> | Gambating A  | 22/4/82  | Sandakan     | Leila FR      |
| SAN96274  | <LOD | - | <LOD | - | <i>Glochidion</i> | <i>littorale</i> | Aban G       | 16/9/83  | Sandakan     | Leila FR      |
| 61731     | <LOD | - | <LOD | - | <i>Glochidion</i> | <i>littorale</i> | Binson S     | 7/2/68   | Sandakan     | Leila FR      |
| 52632     | <LOD | - | <LOD | - | <i>Glochidion</i> | <i>littorale</i> | Kanis A      | 8/10/65  | Sandakan     | Leila FR      |
| SAN32645  | <LOD | - | <LOD | - | <i>Glochidion</i> | <i>littorale</i> | Jawanting A  | 24/11/62 | Beluran      | Mamahat FR    |
| SAN103092 | <LOD | - | <LOD | - | <i>Glochidion</i> | <i>littorale</i> | Amin AAS     | 15/4/86  | Papar        | Mandahan      |
| SAN122849 | <LOD | - | <LOD | - | <i>Glochidion</i> | <i>littorale</i> | Amin AAS     | 29/6/89  | Papar        | Mandahan      |
| SAN126592 | <LOD | - | <LOD | - | <i>Glochidion</i> | <i>littorale</i> | Amin AAS     | 27/4/92  | Papar        | Mandahan      |
| SAN32239  | <LOD | - | <LOD | - | <i>Glochidion</i> | <i>littorale</i> | Talip APA    | 27/10/62 | Papar        | Mandahan      |
| SAN78046  | <LOD | - | <LOD | - | <i>Glochidion</i> | <i>littorale</i> | Diwol S      | 25/3/74  | Papar        | Mandahan      |
| SAN80013  | <LOD | - | <LOD | - | <i>Glochidion</i> | <i>littorale</i> | Diwol S      | 5/6/75   | Papar        | Mandahan      |
| 47880     | <LOD | - | <LOD | - | <i>Glochidion</i> | <i>littorale</i> | Sinanggul HT | 27/10/64 | Papar        | Mandahan      |
| SAN102637 | <LOD | - | <LOD | - | <i>Glochidion</i> | <i>littorale</i> | Amin AAS     | 12/7/86  | Sipitang     | Marintaman    |



|           |      |   |      |   |                   |                  |              |          |              |                   |
|-----------|------|---|------|---|-------------------|------------------|--------------|----------|--------------|-------------------|
| SAN102923 | <LOD | - | <LOD | - | <i>Glochidion</i> | <i>littorale</i> | Amin AAS     | 23/10/85 | Beaufort     | Membakut          |
| SAN102928 | <LOD | - | <LOD | - | <i>Glochidion</i> | <i>littorale</i> | Amin AAS     | 25/10/85 | Beaufort     | Membakut          |
| SAN111356 | <LOD | - | <LOD | - | <i>Glochidion</i> | <i>littorale</i> | Madani L     | 10/9/85  | Beaufort     | Membakut          |
| SAN115227 | <LOD | - | <LOD | - | <i>Glochidion</i> | <i>littorale</i> | Amin AAS     | 28/8/88  | Beaufort     | Membakut          |
| SAN115351 | <LOD | - | <LOD | - | <i>Glochidion</i> | <i>littorale</i> | Amin AAS     | 20/1/90  | Beaufort     | Membakut          |
| SAN126140 | <LOD | - | <LOD | - | <i>Glochidion</i> | <i>littorale</i> | Amin AAS     | 28/1/91  | Beaufort     | Membakut          |
| SAN106009 | <LOD | - | <LOD | - | <i>Glochidion</i> | <i>littorale</i> | Amin AAS     | 21/8/91  | Sipitang     | Mengalong FR      |
| SAN115080 | <LOD | - | <LOD | - | <i>Glochidion</i> | <i>littorale</i> | Amin AAS     | 22/9/87  | Sipitang     | Mengalong FR      |
| SAN84360  | <LOD | - | <LOD | - | <i>Glochidion</i> | <i>littorale</i> | Talib B      | 16/8/76  | Sipitang     | Mengalong FR      |
| 44-54     | <LOD | - | <LOD | - | <i>Glochidion</i> | <i>littorale</i> | AgriRCTuaran | 6/9/65   | Tuaran       | Mengkabong        |
| 55-17     | <LOD | - | <LOD | - | <i>Glochidion</i> | <i>littorale</i> | AgriRCTuaran | 6/9/65   | Tuaran       | Mengkabong        |
| SAN86793  | <LOD | - | <LOD | - | <i>Glochidion</i> | <i>littorale</i> | Stone BC     | 12/4/77  | Kudat        | Pulau Balambangan |
| SAN87077  | <LOD | - | <LOD | - | <i>Glochidion</i> | <i>littorale</i> | Stone BC     | 7/4/77   | Kudat        | Pulau Balambangan |
| SAN87096  | <LOD | - | <LOD | - | <i>Glochidion</i> | <i>littorale</i> | Stone BC     | 8/4/77   | Kudat        | Pulau Balambangan |
| SAN149628 | <LOD | - | <LOD | - | <i>Glochidion</i> | <i>littorale</i> | Ubaldu M     | 25/7/08  | Tawau        | Pulau Bingluran   |
| SAN136213 | <LOD | - | <LOD | - | <i>Glochidion</i> | <i>littorale</i> | Meijer W     | 30/6/92  | KotaKinabalu | Pulau Gaya        |
| 56129     | <LOD | - | <LOD | - | <i>Glochidion</i> | <i>littorale</i> | Kanis A      | 17/2/66  | KotaKinabalu | Pulau Gaya        |
| 33697     | <LOD | - | <LOD | - | <i>Glochidion</i> | <i>littorale</i> | Chong J      | 6/4/63   | KotaKinabalu | Pulau Gaya        |
| SAN136587 | <LOD | - | <LOD | - | <i>Glochidion</i> | <i>littorale</i> | Meijer W     | 8/8/92   | KotaKinabalu | Pulau Manukan     |
| SAN103197 | <LOD | - | <LOD | - | <i>Glochidion</i> | <i>littorale</i> | Amin AAS     | 16/3/87  | KualaPenyu   | Pulau Tiga        |
| SAN126034 | <LOD | - | <LOD | - | <i>Glochidion</i> | <i>littorale</i> | Amin AAS     | 15/3/90  | KualaPenyu   | Pulau Tiga        |
| SAN126315 | <LOD | - | <LOD | - | <i>Glochidion</i> | <i>littorale</i> | Amin AAS     | 23/5/92  | KualaPenyu   | Pulau Tiga        |
| SAN126833 | <LOD | - | <LOD | - | <i>Glochidion</i> | <i>littorale</i> | Amin AAS     | 9/3/89   | KualaPenyu   | Pulau Tiga        |
| SAN126926 | <LOD | - | <LOD | - | <i>Glochidion</i> | <i>littorale</i> | Amin AAS     | 20/5/91  | KualaPenyu   | Pulau Tiga        |
| SAN127172 | <LOD | - | <LOD | - | <i>Glochidion</i> | <i>littorale</i> | Amin AAS     | 26/4/93  | KualaPenyu   | Pulau Tiga        |
| SAN86546  | <LOD | - | <LOD | - | <i>Glochidion</i> | <i>littorale</i> | Amin AAS     | 13/8/85  | KualaPenyu   | Pulau Tiga        |
| SAN122301 | <LOD | - | <LOD | - | <i>Glochidion</i> | <i>littorale</i> | Meijer W     | 15/9/87  | Sandakan     | Sandakan          |

|           |      |     |      |   |                   |                  |             |          |              |                        |
|-----------|------|-----|------|---|-------------------|------------------|-------------|----------|--------------|------------------------|
| SAN107858 | <LOD | -   | <LOD | - | <i>Glochidion</i> | <i>littorale</i> | Gambating A | 15/5/85  | Sandakan     | Sepilok Kabili FR      |
| SAN81159  | <LOD | -   | <LOD | - | <i>Glochidion</i> | <i>littorale</i> | Saikeh L    | 11/2/75  | Sandakan     | Sepilok Kabili FR      |
| SAN115546 | <LOD | -   | <LOD | - | <i>Glochidion</i> | <i>littorale</i> | Amin AAS    | 11/2/88  | Beaufort     | Siaungau FR            |
| SAN115064 | <LOD | -   | <LOD | - | <i>Glochidion</i> | <i>littorale</i> | Amin AAS    | 22/8/87  | Sipitang     | Sipitang               |
| SAN108013 | <LOD | -   | <LOD | - | <i>Glochidion</i> | <i>littorale</i> | Sign G      | 7/12/85  | Kinabatangan | Tangkulap FR           |
| SAN149713 | <LOD | -   | <LOD | - | <i>Glochidion</i> | <i>littorale</i> | Dauni S     | 30/8/08  | Kinabatangan | Trusan Kinabatangan    |
| SAN67017  | <LOD | -   | <LOD | - | <i>Glochidion</i> | <i>littorale</i> | Hepburn AJ  | 17/11/70 | Sipitang     | Usok                   |
| SAN103070 | <LOD | -   | <LOD | - | <i>Glochidion</i> | <i>littorale</i> | Amin AAS    | 18/3/86  | Beaufort     | Weston                 |
| SAN43213  | <LOD | -   | <LOD | - | <i>Glochidion</i> | <i>littorale</i> | Meijer W    | 28/6/64  | Beaufort     | Weston                 |
| 43213     | <LOD | -   | <LOD | - | <i>Glochidion</i> | <i>littorale</i> | Meijer W    | 28/6/64  | Beaufort     | Weston                 |
| SAN154155 | 38   | -   | <LOD | - | <i>Glochidion</i> | <i>lutescens</i> | Pius G      | 26/10/11 | Keningau     | Trus Madi              |
| SAN78189  | 50   | -   | <LOD | - | <i>Glochidion</i> | <i>lutescens</i> | Diwol S     | 19/6/74  | Beaufort     | Beaufort               |
| 44545     | 65   | -   | <LOD | - | <i>Glochidion</i> | <i>lutescens</i> | Lajangah JK | 18/7/65  | Beaufort     | Lumat                  |
| 49994     | 68   | -   | <LOD | - | <i>Glochidion</i> | <i>lutescens</i> | Meijer W    | 14/4/65  | Lahad Datu   | Lahad Datu             |
| SAN150781 | 75   | -   | <LOD | - | <i>Glochidion</i> | <i>lutescens</i> | Pius G      | 23/3/10  | Ranau        | Ranau                  |
| SAN19020  | 80   | -   | <LOD | - | <i>Glochidion</i> | <i>lutescens</i> | Ahwing J    | 9/12/62  | Sandakan     | Sandakan               |
| SAN56029  | 82   | -   | <LOD | - | <i>Glochidion</i> | <i>lutescens</i> | Maikin L    | 9/5/84   | Tambunan     | Kirokot                |
| 41885     | 99   | -   | <LOD | - | <i>Glochidion</i> | <i>lutescens</i> | Mikil G     | 14/11/64 | Tambunan     | Tambunan               |
| SAN82764  | 239  | 246 | 106  | - | <i>Glochidion</i> | <i>lutescens</i> | Saikeh L    | 26/1/76  | Ranau        | Kinabalu National Park |
| SAN70581  | <LOD | -   | 69   | - | <i>Glochidion</i> | <i>lutescens</i> | Kumin M     | 29/8/70  | Kinabatangan | Kuala Karamuak         |
| SAN86671  | <LOD | -   | <LOD | - | <i>Glochidion</i> | <i>lutescens</i> | Fidilis K   | 19/4/77  | Tawau        | Apas                   |
| 40215     | <LOD | -   | <LOD | - | <i>Glochidion</i> | <i>lutescens</i> | Jawanting A | 16/6/64  | Beaufort     | Beaufort               |
| SAN99222  | <LOD | -   | <LOD | - | <i>Glochidion</i> | <i>lutescens</i> | Aban G      | 14/7/83  | Beluran      | Beluran                |
| SAN33739  | <LOD | -   | <LOD | - | <i>Glochidion</i> | <i>lutescens</i> | Putan S     | 29/1/63  | KotaKinabalu | Bukit Padang           |
| SAN112149 | <LOD | -   | <LOD | - | <i>Glochidion</i> | <i>lutescens</i> | Aik J       | 2/6/86   | Lahad Datu   | Danum Valley           |
| SAN125532 | <LOD | -   | <LOD | - | <i>Glochidion</i> | <i>lutescens</i> | Asik M      | 19/8/88  | Tambunan     | Gn Trus Madi           |

|           |      |   |      |   |                   |                  |           |          |              |               |
|-----------|------|---|------|---|-------------------|------------------|-----------|----------|--------------|---------------|
| SAN122778 | <LOD | - | <LOD | - | <i>Glochidion</i> | <i>lutescens</i> | Bousi J   | 21/1/88  | Kinabatangan | Gomantong FR  |
| SAN95723  | <LOD | - | <LOD | - | <i>Glochidion</i> | <i>lutescens</i> | Fidilis K | 17/3/83  | Tawau        | Kalabakan     |
| SAN79837  | <LOD | - | <LOD | - | <i>Glochidion</i> | <i>lutescens</i> | Aban G    | 24/7/74  | Kunak        | Kalumpang FR  |
| SAN113081 | <LOD | - | <LOD | - | <i>Glochidion</i> | <i>lutescens</i> | Sumbing J | 16/11/85 | Keningau     | Keningau      |
| SAN102944 | <LOD | - | <LOD | - | <i>Glochidion</i> | <i>lutescens</i> | Amin AAS  | 15/11/85 | Beaufort     | Kg Hindian FR |
| SAN84524  | <LOD | - | <LOD | - | <i>Glochidion</i> | <i>lutescens</i> | Talib B   | 16/11/76 | Beaufort     | Kg Hindian FR |
| 1252      | <LOD | - | <LOD | - | <i>Glochidion</i> | <i>lutescens</i> | Sato T    | 16/8/81  | Papar        | Kimanis       |
| SAN80737  | <LOD | - | <LOD | - | <i>Glochidion</i> | <i>lutescens</i> | Talib B   | 28/7/76  | Beaufort     | Klias FR      |
| SAN97065  | <LOD | - | <LOD | - | <i>Glochidion</i> | <i>lutescens</i> | Aban G    | 8/6/83   | Kinabatangan | Kretam        |
| SAN108217 | <LOD | - | <LOD | - | <i>Glochidion</i> | <i>lutescens</i> | Argent G  | 24/2/85  | Lahad Datu   | Lahad Datu    |
| SAN117126 | <LOD | - | <LOD | - | <i>Glochidion</i> | <i>lutescens</i> | Kuntil L  | 24/6/87  | Lahad Datu   | Lahad Datu    |
| SAN96802  | <LOD | - | <LOD | - | <i>Glochidion</i> | <i>lutescens</i> | Lee YF    | 6/5/83   | Lahad Datu   | Lahad Datu    |
| 51325     | <LOD | - | <LOD | - | <i>Glochidion</i> | <i>lutescens</i> | Meijer W  | 11/8/65  | Kinabatangan | Lamag         |
| SAN75603  | <LOD | - | <LOD | - | <i>Glochidion</i> | <i>lutescens</i> | Shea G    | 20/4/72  | Tawau        | Luasong       |
| SAN102734 | <LOD | - | <LOD | - | <i>Glochidion</i> | <i>lutescens</i> | Amin AAS  | 23/10/86 | Beaufort     | Lumat         |
| SAN77898  | <LOD | - | <LOD | - | <i>Glochidion</i> | <i>lutescens</i> | Karim AM  | 8/9/73   | Beaufort     | Lumat         |
| SAN69851  | <LOD | - | <LOD | - | <i>Glochidion</i> | <i>lutescens</i> | Lee YF    | 7/9/83   | Sipitang     | Maligan       |
| SAN103383 | <LOD | - | <LOD | - | <i>Glochidion</i> | <i>lutescens</i> | Amin AAS  | 14/4/87  | Sipitang     | Marintaman    |
| SAN103278 | <LOD | - | <LOD | - | <i>Glochidion</i> | <i>lutescens</i> | Amin AAS  | 21/11/86 | Beaufort     | Membakut      |
| SAN106047 | <LOD | - | <LOD | - | <i>Glochidion</i> | <i>lutescens</i> | Amin AAS  | 25/8/91  | Sipitang     | Mengalong FR  |
| SAN124146 | <LOD | - | <LOD | - | <i>Glochidion</i> | <i>lutescens</i> | Diwol S   | 21/6/88  | Sipitang     | Mengalong FR  |
| SAN82606  | <LOD | - | <LOD | - | <i>Glochidion</i> | <i>lutescens</i> | Madani L  | 17/11/75 | Ranau        | Merungin      |
| SAN82676  | <LOD | - | <LOD | - | <i>Glochidion</i> | <i>lutescens</i> | Madani L  | 22/11/75 | Ranau        | Merungin      |
| SAN111431 | <LOD | - | <LOD | - | <i>Glochidion</i> | <i>lutescens</i> | Madani L  | 16/9/85  | Sipitang     | Mesapol FR    |
| SAN120756 | <LOD | - | <LOD | - | <i>Glochidion</i> | <i>lutescens</i> | Bousi J   | 31/7/87  | Lahad Datu   | Mt Silam      |
| SAN80898  | <LOD | - | <LOD | - | <i>Glochidion</i> | <i>lutescens</i> | Diwol S   | 19/6/76  | Nabawan      | Nabawan       |
| SAN60468  | <LOD | - | <LOD | - | <i>Glochidion</i> | <i>lutescens</i> | Amin AAS  | 23/7/84  | Penampang    | Penampang     |

|           |      |   |      |   |                   |                    |             |          |              |                   |
|-----------|------|---|------|---|-------------------|--------------------|-------------|----------|--------------|-------------------|
| SAN100385 | <LOD | - | <LOD | - | <i>Glochidion</i> | <i>lutescens</i>   | Rahim A     | 19/9/83  | Kinabatangan | Pinangah          |
| SAN117176 | <LOD | - | <LOD | - | <i>Glochidion</i> | <i>lutescens</i>   | Mansus S    | 23/10/86 | Kinabatangan | Pinangah          |
| SAN60234  | <LOD | - | <LOD | - | <i>Glochidion</i> | <i>lutescens</i>   | Madani L    | 24/8/84  | Kinabatangan | Pinangah          |
| SAN93034  | <LOD | - | <LOD | - | <i>Glochidion</i> | <i>lutescens</i>   | Aban G      | 11/9/80  | Semporna     | Pulau Boheydulang |
| SAN123205 | <LOD | - | <LOD | - | <i>Glochidion</i> | <i>lutescens</i>   | Gambating A | 16/4/88  | Ranau        | Ranau             |
| SAN97240  | <LOD | - | <LOD | - | <i>Glochidion</i> | <i>lutescens</i>   | Aban G      | 16/6/83  | Sandakan     | Sandakan          |
| SAN127075 | <LOD | - | <LOD | - | <i>Glochidion</i> | <i>lutescens</i>   | Amin AAS    | 23/11/90 | Beaufort     | Siaungau FR       |
| SAN102649 | <LOD | - | <LOD | - | <i>Glochidion</i> | <i>lutescens</i>   | Amin AAS    | 15/7/86  | Sipitang     | Sipitang          |
| SAN126505 | <LOD | - | <LOD | - | <i>Glochidion</i> | <i>lutescens</i>   | Amin AAS    | 26/5/89  | Sipitang     | Sipitang          |
| SAN73300  | <LOD | - | <LOD | - | <i>Glochidion</i> | <i>lutescens</i>   | Saikah L    | 22/5/71  | Keningau     | Sook              |
| SAN84219  | <LOD | - | <LOD | - | <i>Glochidion</i> | <i>lutescens</i>   | Nordin AA   | 22/1/77  | Keningau     | Sook              |
| SAN142601 | <LOD | - | <LOD | - | <i>Glochidion</i> | <i>lutescens</i>   | Madani L    | 8/9/98   | Penampang    | Sugud             |
| SAN124970 | <LOD | - | <LOD | - | <i>Glochidion</i> | <i>lutescens</i>   | Soinin S    | 21/10/89 | Tambunan     | Tambunan          |
| SAN109641 | <LOD | - | <LOD | - | <i>Glochidion</i> | <i>lutescens</i>   | Majawat G   | 12/5/89  | Kinabatangan | Tangkulap FR      |
| SAN141163 | <LOD | - | <LOD | - | <i>Glochidion</i> | <i>lutescens</i>   | Goh SH      | 11/6/98  | Tawau        | Tawau             |
| SAN133972 | <LOD | - | <LOD | - | <i>Glochidion</i> | <i>lutescens</i>   | Madani L    | 25/8/92  | Beluran      | Telupid           |
| SAN91266  | <LOD | - | <LOD | - | <i>Glochidion</i> | <i>lutescens</i>   | Aban G      | 17/8/79  | Beluran      | Telupid           |
| SAN117525 | <LOD | - | <LOD | - | <i>Glochidion</i> | <i>lutescens</i>   | Maikin L    | 29/10/86 | Kinabatangan | Tongod            |
| SAN80404  | <LOD | - | <LOD | - | <i>Glochidion</i> | <i>lutescens</i>   | Talib B     | 24/2/76  | Keningau     | Tulid             |
| SAN84296  | <LOD | - | <LOD | - | <i>Glochidion</i> | <i>lutescens</i>   | Nordin AA   | 11/3/77  | Keningau     | Tulid             |
| SAN84302  | <LOD | - | <LOD | - | <i>Glochidion</i> | <i>lutescens</i>   | Nordin AA   | 12/3/77  | Keningau     | Tulid             |
| SAN85818  | <LOD | - | <LOD | - | <i>Glochidion</i> | <i>lutescens</i>   | Nordin AA   | 23/7/77  | Keningau     | Tulid             |
| SAN99836  | <LOD | - | <LOD | - | <i>Glochidion</i> | <i>lutescens</i>   | Rahim A     | 2/8/83   | Beluran      | Ulu Tungud FR     |
| SAN103217 | <LOD | - | <LOD | - | <i>Glochidion</i> | <i>lutescens</i>   | Amin AAS    | 25/3/87  | Beaufort     | Weston            |
| SAN126369 | <LOD | - | <LOD | - | <i>Glochidion</i> | <i>macrostigma</i> | Amin AAS    | 25/6/92  | Beaufort     | Beaufort          |
| SAN98777  | <LOD | - | <LOD | - | <i>Glochidion</i> | <i>macrostigma</i> | Amin AAS    | 23/7/93  | Beaufort     | Binsulok FR       |
| SAN108151 | <LOD | - | <LOD | - | <i>Glochidion</i> | <i>macrostigma</i> | Gambating A | 13/2/85  | Kinabatangan | Keruak FR         |

|           |      |   |      |   |                   |                    |             |          |              |                   |
|-----------|------|---|------|---|-------------------|--------------------|-------------|----------|--------------|-------------------|
| SAN97333  | <LOD | - | <LOD | - | <i>Glochidion</i> | <i>macrostigma</i> | Diwol S     | 20/6/83  | Kinabatangan | Kuala Karamuak    |
| SAN102773 | <LOD | - | <LOD | - | <i>Glochidion</i> | <i>macrostigma</i> | Amin AAS    | 14/9/85  | Beaufort     | Lumat             |
| SAN100066 | <LOD | - | <LOD | - | <i>Glochidion</i> | <i>macrostigma</i> | Aban G      | 19/8/83  | KotaMarudu   | Marak Parak       |
| SAN135660 | <LOD | - | <LOD | - | <i>Glochidion</i> | <i>macrostigma</i> | Fidilis K   | 14/7/93  | Kinabatangan | Pinangah          |
| SAN90225  | <LOD | - | <LOD | - | <i>Glochidion</i> | <i>macrostigma</i> | Aban G      | 2/6/79   | Ranau        | Ranau             |
| SAN154844 | <LOD | - | <LOD | - | <i>Glochidion</i> | <i>macrostigma</i> | Suzana S    | 13/6/12  | Sapulut      | Sg Siliawan       |
| SAN67601  | <LOD | - | <LOD | - | <i>Glochidion</i> | <i>macrostigma</i> | Amin AAS    | 18/9/84  | Kinabatangan | Tongod            |
| SAN108729 | <LOD | - | <LOD | - | <i>Glochidion</i> | <i>macrostigma</i> | Madani L    | 14/4/85  | Kinabatangan | Ulu Segama FR     |
| SAN99783  | <LOD | - | <LOD | - | <i>Glochidion</i> | <i>macrostigma</i> | Sign G      | 2/8/83   | Beluran      | Ulu Tungud FR     |
| SAN85477  | 47   | - | <LOD | - | <i>Glochidion</i> | <i>mindoreense</i> | Arshid T    | 21/5/77  | Sandakan     | Sepilok Kabili FR |
| 61552     | 49   | - | <LOD | - | <i>Glochidion</i> | <i>mindoreense</i> | Meijer W    | 17/8/67  | Sandakan     | Sepilok Kabili FR |
| SAN90786  | <LOD | - | <LOD | - | <i>Glochidion</i> | <i>mindoreense</i> | Madani L    | 11/7/79  | Lahad Datu   | Pulau Silumpat    |
| SAN26683  | <LOD | - | <LOD | - | <i>Glochidion</i> | <i>mindoreense</i> | Chai M      | 17/10/61 | Lahad Datu   | Pulau Tabawan     |
| SAN26683  | <LOD | - | <LOD | - | <i>Glochidion</i> | <i>mindoreense</i> | Chai M      | 17/10/61 | Lahad Datu   | Pulau Tabawan     |
| SAN149384 | <LOD | - | <LOD | - | <i>Glochidion</i> | <i>mindoreense</i> | Pius G      | 23/10/07 | Lahad Datu   | Silam             |
| SAN25052  | <LOD | - | <LOD | - | <i>Glochidion</i> | <i>mindoreense</i> | Chai M      | 1/6/61   | Lahad Datu   | Silam             |
| 56177     | <LOD | - | <LOD | - | <i>Glochidion</i> | <i>mindoreense</i> | Kanis A     | 16/5/66  | Tawau        | Tawau             |
| rsnb4017  | <LOD | - | <LOD | - | <i>Glochidion</i> | <i>monostylum</i>  | Chew WL     | 20/1/64  | Ranau        | Mesilau           |
| 271       | <LOD | - | <LOD | - | <i>Glochidion</i> | <i>monostylum</i>  | Chew WL     | 5/8/61   | Ranau        | Mt.Kinabalu       |
| 35331     | <LOD | - | 60   | - | <i>Glochidion</i> | <i>obscurum</i>    | Jawanting A | 28/5/63  | Kinabatangan | Lamag             |
| SAN71165  | <LOD | - | 79   | - | <i>Glochidion</i> | <i>obscurum</i>    | Diwol S     |          | Beluran      | Telupid           |
| SAN114939 | <LOD | - | <LOD | - | <i>Glochidion</i> | <i>obscurum</i>    | Amin AAS    | 16/12/89 | Beaufort     | Beaufort          |
| SAN127335 | <LOD | - | <LOD | - | <i>Glochidion</i> | <i>obscurum</i>    | Amin AAS    | 26/9/90  | Beaufort     | Beaufort          |
| SAN84397  | <LOD | - | <LOD | - | <i>Glochidion</i> | <i>obscurum</i>    | Talib B     | 25/8/76  | Beaufort     | Beaufort          |
| SAN113631 | <LOD | - | <LOD | - | <i>Glochidion</i> | <i>obscurum</i>    | Gambating A | 29/10/85 | Beluran      | Beluran           |
| SAN67130  | <LOD | - | <LOD | - | <i>Glochidion</i> | <i>obscurum</i>    | Aban G      | 17/9/84  | Beluran      | Beluran           |
| SAN139644 | <LOD | - | <LOD | - | <i>Glochidion</i> | <i>obscurum</i>    | Sumbing J   | 22/1/95  | Nabawan      | Bkt Pisagan       |

|           |      |   |      |   |                   |                 |             |          |              |                  |
|-----------|------|---|------|---|-------------------|-----------------|-------------|----------|--------------|------------------|
| SAN66807  | <LOD | - | <LOD | - | <i>Glochidion</i> | <i>obscurum</i> | Aban G      | 22/4/70  | Tenom        | Crocker Range NP |
| SAN94881  | <LOD | - | <LOD | - | <i>Glochidion</i> | <i>obscurum</i> | Fidilis K   | 12/6/82  | Tawau        | Kalabakan        |
| SAN73283  | <LOD | - | <LOD | - | <i>Glochidion</i> | <i>obscurum</i> | Saikeh L    | 21/5/71  | Keningau     | Keningau         |
| SAN28799  | <LOD | - | <LOD | - | <i>Glochidion</i> | <i>obscurum</i> | Lajangah JK | 20/9/62  | Papar        | Kimanis          |
| SAN80462  | <LOD | - | <LOD | - | <i>Glochidion</i> | <i>obscurum</i> | Diwol S     | 20/3/76  | Papar        | Kimanis          |
| SAN33958  | <LOD | - | <LOD | - | <i>Glochidion</i> | <i>obscurum</i> | Ahwing J    | 16/1/63  | Kinabatangan | Kretam FR        |
| SAN81733  | <LOD | - | <LOD | - | <i>Glochidion</i> | <i>obscurum</i> | Madani L    | 21/6/75  | Kinabatangan | Kuala Karamuak   |
| SAN136394 | <LOD | - | <LOD | - | <i>Glochidion</i> | <i>obscurum</i> | Diwol S     | 11/8/03  | Kinabatangan | Maliau Basin     |
| SAN114663 | <LOD | - | <LOD | - | <i>Glochidion</i> | <i>obscurum</i> | Amin AAS    | 9/7/87   | Papar        | Mandahan         |
| SAN126237 | <LOD | - | <LOD | - | <i>Glochidion</i> | <i>obscurum</i> | Amin AAS    | 18/8/90  | Papar        | Mandahan         |
| SAN99351  | <LOD | - | <LOD | - | <i>Glochidion</i> | <i>obscurum</i> | Diwol S     | 13/8/83  | Ranau        | Matopang         |
| SAN99351  | <LOD | - | <LOD | - | <i>Glochidion</i> | <i>obscurum</i> | Diwol S     | 13/8/83  | Ranau        | Matopang         |
| 65226     | <LOD | - | <LOD | - | <i>Glochidion</i> | <i>obscurum</i> | Aban G      | 7/3/69   | Sipitang     | Mendolong        |
| 41381     | <LOD | - | <LOD | - | <i>Glochidion</i> | <i>obscurum</i> | Corpuz FM   | 25/1/64  | Papar        | Papar            |
| SAN60257  | <LOD | - | <LOD | - | <i>Glochidion</i> | <i>obscurum</i> | Sigin G     | 29/8/84  | Kinabatangan | Pinangah         |
| SAN109357 | <LOD | - | <LOD | - | <i>Glochidion</i> | <i>obscurum</i> | Gambating A | 13/6/85  | Ranau        | Ranau            |
| SAN109707 | <LOD | - | <LOD | - | <i>Glochidion</i> | <i>obscurum</i> | Sigin G     | 17/6/85  | Ranau        | Ranau            |
| SAN114250 | <LOD | - | <LOD | - | <i>Glochidion</i> | <i>obscurum</i> | Gambating A | 17/3/86  | Ranau        | Ranau            |
| SAN11567  | <LOD | - | <LOD | - | <i>Glochidion</i> | <i>obscurum</i> | Amin AAS    | 17/7/86  | Ranau        | Ranau            |
| SAN116426 | <LOD | - | <LOD | - | <i>Glochidion</i> | <i>obscurum</i> | Gambating A | 16/10/86 | Ranau        | Ranau            |
| SAN118115 | <LOD | - | <LOD | - | <i>Glochidion</i> | <i>obscurum</i> | Gambating A | 18/6/87  | Ranau        | Ranau            |
| SAN128349 | <LOD | - | <LOD | - | <i>Glochidion</i> | <i>obscurum</i> | Fidilis K   | 19/2/90  | Nabawan      | Sapulut          |
| SAN16064  | <LOD | - | <LOD | - | <i>Glochidion</i> | <i>obscurum</i> | Wood GHS    | 3/4/55   | Lahad Datu   | Segama           |
| SAN25990  | <LOD | - | <LOD | - | <i>Glochidion</i> | <i>obscurum</i> | Chai M      | 6/8/61   | Lahad Datu   | Segama           |
| SAN26667  | <LOD | - | <LOD | - | <i>Glochidion</i> | <i>obscurum</i> | Chai M      | 11/10/61 | Lahad Datu   | Segama           |
| SAN115470 | <LOD | - | <LOD | - | <i>Glochidion</i> | <i>obscurum</i> | Amin AAS    | 10/4/88  | Sipitang     | Sipitang         |
| SAN123869 | <LOD | - | <LOD | - | <i>Glochidion</i> | <i>obscurum</i> | Bousi J     | 27/4/88  | Tambunan     | Tambunan         |

|           |      |   |      |   |                   |                    |              |          |              |                        |
|-----------|------|---|------|---|-------------------|--------------------|--------------|----------|--------------|------------------------|
| SAN117200 | <LOD | - | <LOD | - | <i>Glochidion</i> | <i>obscurum</i>    | Maikin L     | 27/12/86 | Kinabatangan | Tongod                 |
| SAN111533 | <LOD | - | <LOD | - | <i>Glochidion</i> | <i>obscurum</i>    | Gambating A  | 26/10/85 | Beluran      | Ulu Sapa Payau FR      |
| SAN92095  | <LOD | - | <LOD | - | <i>Glochidion</i> | <i>obscurum</i>    | LasSAN P     | 6/5/80   | Kinabatangan | Ulu Segama FR          |
| 63895     | <LOD | - | <LOD | - | <i>Glochidion</i> | <i>obscurum</i>    | Bongsu A     | 15/9/68  | Tawau        | Umas Umas              |
| 63894     | <LOD | - | <LOD | - | <i>Glochidion</i> | <i>perakense</i>   | Bongsu A     | 14/9/68  | Tawau        | Umas Umas              |
| 51062     | 84   | - | <LOD | - | <i>Glochidion</i> | <i>philippicum</i> | Sinanggul HT | 15/5/65  | Kudat        | Loro FR                |
| 38968     | 95   | - | <LOD | - | <i>Glochidion</i> | <i>philippicum</i> | Ahwing J     | 30/7/63  | Sandakan     | Sandakan               |
| SAN84663  | <LOD | - | <LOD | - | <i>Glochidion</i> | <i>philippicum</i> | Talib B      | 23/7/77  | Beaufort     | Beaufort               |
| SAN71603  | <LOD | - | <LOD | - | <i>Glochidion</i> | <i>philippicum</i> | Jahudin B    | 18/2/71  | Beluran      | Beluran                |
| 50161     | <LOD | - | <LOD | - | <i>Glochidion</i> | <i>philippicum</i> | Madani L     | 11/8/67  | Sandakan     | Garinono FR            |
| SAN32788  | <LOD | - | <LOD | - | <i>Glochidion</i> | <i>philippicum</i> | Jawanting A  | 30/1/63  | Kinabatangan | Lamag                  |
| SAN74254  | <LOD | - | <LOD | - | <i>Glochidion</i> | <i>philippicum</i> | Imbongan A   | 15/9/71  | Kinabatangan | Lamag                  |
| SAN121165 | <LOD | - | <LOD | - | <i>Glochidion</i> | <i>philippicum</i> | Gambating A  | 19/11/87 | Ranau        | Muruk                  |
| 35065     | <LOD | - | <LOD | - | <i>Glochidion</i> | <i>philippicum</i> | Madani L     | 21/3/63  | Nabawan      | Pensiangan             |
| 35065     | <LOD | - | <LOD | - | <i>Glochidion</i> | <i>philippicum</i> | Madani L     | 21/3/63  | Nabawan      | Pensiangan             |
| 32868     | <LOD | - | <LOD | - | <i>Glochidion</i> | <i>philippicum</i> | Jawanting A  | 22/3/63  | Sandakan     | Sandakan               |
| SAN64511  | <LOD | - | <LOD | - | <i>Glochidion</i> | <i>philippicum</i> | Madani L     | 10/7/68  | Sandakan     | Sepilok Kabili FR      |
| SAN81132  | 58   | - | <LOD | - | <i>Glochidion</i> | <i>pubicapsa</i>   | Aban G       | 15/1/75  | Beluran      | Segaliud Lokan FR      |
| SAN69253  | <LOD | - | 237  | - | <i>Glochidion</i> | <i>pubicapsa</i>   | Saikah L     | 7/4/70   | Tawau        | Luasong                |
| SAN80143  | <LOD | - | <LOD | - | <i>Glochidion</i> | <i>pubicapsa</i>   | Diwol S      | 12/8/75  | Beaufort     | Beaufort               |
| SAN82269  | <LOD | - | <LOD | - | <i>Glochidion</i> | <i>pubicapsa</i>   | Aban G       | 10/9/75  | Kinabatangan | Gandum FR              |
| SAN123810 | <LOD | - | <LOD | - | <i>Glochidion</i> | <i>pubicapsa</i>   | Bousi J      | 25/1/88  | Kinabatangan | Gomantong FR           |
| SAN75868  | <LOD | - | <LOD | - | <i>Glochidion</i> | <i>pubicapsa</i>   | Arshid T     | 26/9/72  | Ranau        | Kinabalu National Park |
| SAN31698  | <LOD | - | <LOD | - | <i>Glochidion</i> | <i>pubicapsa</i>   | Chai M       | 9/1/63   | Lahad Datu   | Lahad Datu             |
| 54781     | <LOD | - | <LOD | - | <i>Glochidion</i> | <i>pubicapsa</i>   | Talip AH     | 19/3/66  | Lahad Datu   | Lahad Datu             |
| SAN29679  | <LOD | - | <LOD | - | <i>Glochidion</i> | <i>pubicapsa</i>   | Tahir M      | 20/5/62  | Lahad Datu   | Mostyn                 |

|           |      |   |      |      |                   |                  |             |          |              |                   |
|-----------|------|---|------|------|-------------------|------------------|-------------|----------|--------------|-------------------|
| SAN32988  | <LOD | - | <LOD | -    | <i>Glochidion</i> | <i>pubicapsa</i> | Aban G      | 11/12/62 | Tawau        | Quoin Hill FR     |
| SAN81459  | <LOD | - | <LOD | -    | <i>Glochidion</i> | <i>pubicapsa</i> | Madani L    | 13/3/75  | Beluran      | Segaliud Lokan FR |
| SAN74594  | <LOD | - | <LOD | -    | <i>Glochidion</i> | <i>pubicapsa</i> | Diwol S     | 11/12/71 | Beluran      | Telupid           |
| SAN124464 | 38   | - | <LOD | -    | <i>Glochidion</i> | <i>rubrum</i>    | Madani L    | 23/4/88  | Kinabatangan | Maliau Basin      |
| SAN66945  | 42   | - | <LOD | -    | <i>Glochidion</i> | <i>rubrum</i>    | Aban G      | 12/9/70  | Beaufort     | Beaufort          |
| SAN116912 | 42   | - | <LOD | -    | <i>Glochidion</i> | <i>rubrum</i>    | Bousi J     | 8/8/86   | Kinabatangan | Ulu Segama FR     |
| SAN75325  | 43   | - | <LOD | -    | <i>Glochidion</i> | <i>rubrum</i>    | Kumin M     | 7/4/72   | Tawau        | Kalabakan         |
| SAN30596  | 47   | - | <LOD | -    | <i>Glochidion</i> | <i>rubrum</i>    | Aban G      | 21/7/62  | Tawau        | Kalabakan         |
| SAN75956  | 66   | - | <LOD | -    | <i>Glochidion</i> | <i>rubrum</i>    | Shea G      | 6/9/72   | Pitas        | Bengkoka FR       |
| SAN97421  | 69   | - | <LOD | -    | <i>Glochidion</i> | <i>rubrum</i>    | Gambating A | 28/6/83  | Kinabatangan | Tangkalap         |
| SAN90422  | 112  | - | <LOD | -    | <i>Glochidion</i> | <i>rubrum</i>    | Gambating A | 27/5/82  | Sandakan     | Sepilok Kabili FR |
| SAN71618  | 133  | - | <LOD | -    | <i>Glochidion</i> | <i>rubrum</i>    | Jahudin B   | 19/2/71  | Beluran      | Beluran           |
| SAN118873 | <LOD | - | 1411 | 2537 | <i>Glochidion</i> | <i>rubrum</i>    | Gambating A | 9/10/87  | Ranau        | Bukit Kolong      |
| SAN24500  | <LOD | - | <LOD | -    | <i>Glochidion</i> | <i>rubrum</i>    | Brand D     | 7/3/61   | Tawau        | Apas              |
| SAN77497  | <LOD | - | <LOD | -    | <i>Glochidion</i> | <i>rubrum</i>    | Diwol S     | 21/3/73  | Penampang    | Babagon           |
| SAN72153  | <LOD | - | <LOD | -    | <i>Glochidion</i> | <i>rubrum</i>    | Saikeh L    | 6/6/72   | Beaufort     | Beaufort          |
| SAN80190  | <LOD | - | <LOD | -    | <i>Glochidion</i> | <i>rubrum</i>    | Diwol S     | 23/8/75  | Beaufort     | Beaufort          |
| SAN100347 | <LOD | - | <LOD | -    | <i>Glochidion</i> | <i>rubrum</i>    | Amin AAS    | 15/9/84  | Beluran      | Beluran           |
| SAN107630 | <LOD | - | <LOD | -    | <i>Glochidion</i> | <i>rubrum</i>    | Ismail AAP  | 17/1/85  | Beluran      | Beluran           |
| SAN97609  | <LOD | - | <LOD | -    | <i>Glochidion</i> | <i>rubrum</i>    | Aban G      | 11/7/83  | Beluran      | Beluran           |
| SAN59835  | <LOD | - | <LOD | -    | <i>Glochidion</i> | <i>rubrum</i>    | Rahim A     | 14/11/83 | Kinabatangan | Bilit             |
| SAN84405  | <LOD | - | <LOD | -    | <i>Glochidion</i> | <i>rubrum</i>    | Talib B     | 9/9/76   | Papar        | Bongawan          |
| SAN81877  | <LOD | - | <LOD | -    | <i>Glochidion</i> | <i>rubrum</i>    | Aban G      | 12/7/75  | Beluran      | Bonggaya FR       |
| SAN78393  | <LOD | - | <LOD | -    | <i>Glochidion</i> | <i>rubrum</i>    | Diwol S     | 20/9/74  | Tenom        | Crocker Range NP  |
| SAN112931 | <LOD | - | <LOD | -    | <i>Glochidion</i> | <i>rubrum</i>    | Madani L    | 25/11/85 | Lahad Datu   | Danum Valley      |
| SAN114514 | <LOD | - | <LOD | -    | <i>Glochidion</i> | <i>rubrum</i>    | Madani L    | 9/7/86   | Lahad Datu   | Danum Valley      |
| SAN85323  | <LOD | - | <LOD | -    | <i>Glochidion</i> | <i>rubrum</i>    | Stone BC    | 3/9/76   | Lahad Datu   | Danum Valley      |



|           |      |   |      |   |                   |               |             |          |              |                        |
|-----------|------|---|------|---|-------------------|---------------|-------------|----------|--------------|------------------------|
| SAN91408  | <LOD | - | <LOD | - | <i>Glochidion</i> | <i>rubrum</i> | Fidilis K   | 14/12/79 | Kinabatangan | Imbak Valley           |
| SAN95691  | <LOD | - | <LOD | - | <i>Glochidion</i> | <i>rubrum</i> | Fidilis K   | 24/2/83  | Kinabatangan | Imbak Valley           |
| SAN101434 | <LOD | - | <LOD | - | <i>Glochidion</i> | <i>rubrum</i> | Fidilis K   | 24/11/83 | Tawau        | Kalabakan              |
| SAN24631  | <LOD | - | <LOD | - | <i>Glochidion</i> | <i>rubrum</i> | Burgess PF  | 22/2/61  | Tawau        | Kalabakan              |
| SAN75671  | <LOD | - | <LOD | - | <i>Glochidion</i> | <i>rubrum</i> | Chow J      | 15/4/72  | Tawau        | Kalabakan              |
| SAN96054  | <LOD | - | <LOD | - | <i>Glochidion</i> | <i>rubrum</i> | Fidilis K   | 23/3/83  | Tawau        | Kalabakan              |
| SAN25951  | <LOD | - | <LOD | - | <i>Glochidion</i> | <i>rubrum</i> | Chai M      | 24/7/61  | Kunak        | Kalumpang FR           |
| 41277     | <LOD | - | <LOD | - | <i>Glochidion</i> | <i>rubrum</i> | Jawanting A | 8/1/64   | Papar        | Kawang FR              |
| SAN141439 | <LOD | - | <LOD | - | <i>Glochidion</i> | <i>rubrum</i> | Meijer W    | 7/10/94  | Sandakan     | Kebun Cina             |
| SAN60005  | <LOD | - | <LOD | - | <i>Glochidion</i> | <i>rubrum</i> | Amin AAS    | 12/11/83 | Keningau     | Keningau               |
| SAN70134  | <LOD | - | <LOD | - | <i>Glochidion</i> | <i>rubrum</i> | Cockburn PF | 29/9/72  | Ranau        | Kinabalu National Park |
| SAN33213  | <LOD | - | <LOD | - | <i>Glochidion</i> | <i>rubrum</i> | Madani L    | 19/12/62 | Kinabatangan | Kinabatangan           |
| SAN79184  | <LOD | - | <LOD | - | <i>Glochidion</i> | <i>rubrum</i> | -           |          | Kinabatangan | Kuamut FR              |
| SAN30960  | <LOD | - | <LOD | - | <i>Glochidion</i> | <i>rubrum</i> | Brand D     | 24/7/63  | Kudat        | Kudat                  |
| 44184     | <LOD | - | <LOD | - | <i>Glochidion</i> | <i>rubrum</i> | Arshid T    | 15/7/64  | Sandakan     | Labuk Road FR          |
| 55483     | <LOD | - | <LOD | - | <i>Glochidion</i> | <i>rubrum</i> | Aban G      | 19/5/66  | Lahad Datu   | Lahad Datu             |
| SAN120963 | <LOD | - | <LOD | - | <i>Glochidion</i> | <i>rubrum</i> | Majawat G   | 27/7/87  | Kinabatangan | Lamag                  |
| SAN83241  | <LOD | - | <LOD | - | <i>Glochidion</i> | <i>rubrum</i> | Cockburn PF | 20/5/76  | Kinabatangan | Lamag                  |
| 36377     | <LOD | - | <LOD | - | <i>Glochidion</i> | <i>rubrum</i> | Jawanting A | 10/7/63  | Kinabatangan | Lamag                  |
| SAN80601  | <LOD | - | <LOD | - | <i>Glochidion</i> | <i>rubrum</i> | Talib B     | 23/6/76  | Beaufort     | Lingkungan             |
| SAN36122  | <LOD | - | <LOD | - | <i>Glochidion</i> | <i>rubrum</i> | Lajangah JK | 18/5/63  | Kudat        | Loro FR                |
| SAN68793  | <LOD | - | <LOD | - | <i>Glochidion</i> | <i>rubrum</i> | Fidilis K   | 21/1/84  | Tawau        | Luasong                |
| SAN82183  | <LOD | - | <LOD | - | <i>Glochidion</i> | <i>rubrum</i> | Fidilis K   | 8/3/77   | Tawau        | Luasong                |
| SAN89725  | <LOD | - | <LOD | - | <i>Glochidion</i> | <i>rubrum</i> | Fidilis K   | 20/2/79  | Tawau        | Luasong                |
| SAN77922  | <LOD | - | <LOD | - | <i>Glochidion</i> | <i>rubrum</i> | Diwol S     | 10/9/73  | Beaufort     | Lumat                  |
| SAN27045  | <LOD | - | <LOD | - | <i>Glochidion</i> | <i>rubrum</i> | Damit AA    | 25/9/61  | Kunak        | Madai Baturong FR      |

|           |      |   |      |   |                   |               |              |          |              |                   |
|-----------|------|---|------|---|-------------------|---------------|--------------|----------|--------------|-------------------|
| SAN99983  | <LOD | - | <LOD | - | <i>Glochidion</i> | <i>rubrum</i> | Aban G       | 16/8/83  | KotaMarudu   | Marak Parak       |
| SAN86529  | <LOD | - | <LOD | - | <i>Glochidion</i> | <i>rubrum</i> | Amin AAS     | 17/7/85  | Sipitang     | Marintaman        |
| SAN78116  | <LOD | - | <LOD | - | <i>Glochidion</i> | <i>rubrum</i> | Diwol S      | 3/5/74   | Nabawan      | Nabawan           |
| SAN85766  | <LOD | - | <LOD | - | <i>Glochidion</i> | <i>rubrum</i> | Nordin AA    | 8/7/77   | Nabawan      | Nabawan           |
| SAN94937  | <LOD | - | <LOD | - | <i>Glochidion</i> | <i>rubrum</i> | Diwol S      | 9/3/82   | Nabawan      | Nabawan           |
| SAN22249  | <LOD | - | <LOD | - | <i>Glochidion</i> | <i>rubrum</i> | Charington C | 2/7/60   | Tenom        | Pangi             |
| SAN67494  | <LOD | - | <LOD | - | <i>Glochidion</i> | <i>rubrum</i> | Diwol S      | 11/2/85  | Kinabatangan | Pinangah          |
| SAN86769  | <LOD | - | <LOD | - | <i>Glochidion</i> | <i>rubrum</i> | Stone BC     | 11/4/77  | Kudat        | Pulau Balambangan |
| SAN26654  | <LOD | - | <LOD | - | <i>Glochidion</i> | <i>rubrum</i> | Chai M       | 9/10/61  | Lahad Datu   | Pulau Sakar       |
| SAN19626  | <LOD | - | <LOD | - | <i>Glochidion</i> | <i>rubrum</i> | Meijer W     | 18/7/59  | Tawau        | Pulau Sebatik     |
| SAN116242 | <LOD | - | <LOD | - | <i>Glochidion</i> | <i>rubrum</i> | Gambating A  | 24/9/86  | Ranau        | Ranau             |
| SAN117205 | <LOD | - | <LOD | - | <i>Glochidion</i> | <i>rubrum</i> | Gambating A  | 21/11/86 | Ranau        | Ranau             |
| SAN118122 | <LOD | - | <LOD | - | <i>Glochidion</i> | <i>rubrum</i> | Gambating A  | 20/6/87  | Ranau        | Ranau             |
| SAN121437 | <LOD | - | <LOD | - | <i>Glochidion</i> | <i>rubrum</i> | Gambating A  | 16/11/87 | Ranau        | Ranau             |
| SAN78610  | <LOD | - | <LOD | - | <i>Glochidion</i> | <i>rubrum</i> | Madani L     | 16/7/73  | Sandakan     | Sandakan          |
| 35419     | <LOD | - | <LOD | - | <i>Glochidion</i> | <i>rubrum</i> | Sayu E       | 14/3/63  | Sandakan     | Sandakan          |
| SAN22199  | <LOD | - | <LOD | - | <i>Glochidion</i> | <i>rubrum</i> | Burgess PF   | 4/10/60  | Sandakan     | Sapagaya FR       |
| SAN81355  | <LOD | - | <LOD | - | <i>Glochidion</i> | <i>rubrum</i> | Madani L     | 5/3/75   | Beluran      | Sapi              |
| SAN106936 | <LOD | - | <LOD | - | <i>Glochidion</i> | <i>rubrum</i> | Sumbing J    | 13/10/84 | Nabawan      | Sapulut           |
| SAN124242 | <LOD | - | <LOD | - | <i>Glochidion</i> | <i>rubrum</i> | Kulip J      | 12/7/88  | Beluran      | Segaliud Lokan FR |
| SAN140483 | <LOD | - | <LOD | - | <i>Glochidion</i> | <i>rubrum</i> | Nasrah Y     | 31/10/95 | Beluran      | Segaliud Lokan FR |
| SAN81576  | <LOD | - | <LOD | - | <i>Glochidion</i> | <i>rubrum</i> | Madani L     | 26/4/75  | Beluran      | Segaliud Lokan FR |
| 33979     | <LOD | - | <LOD | - | <i>Glochidion</i> | <i>rubrum</i> | Ahwing J     | 19/2/63  | Beluran      | Segaliud Lokan FR |
| SAN21285  | <LOD | - | <LOD | - | <i>Glochidion</i> | <i>rubrum</i> | Meijer W     | 26/4/60  | Sandakan     | Sepilok Kabili FR |
| 53488     | <LOD | - | <LOD | - | <i>Glochidion</i> | <i>rubrum</i> | Kanis A      | 3/9/65   | Sandakan     | Sepilok Kabili FR |
| 30978     | <LOD | - | <LOD | - | <i>Glochidion</i> | <i>rubrum</i> | Brand D      | 15/9/62  | Sandakan     | Sepilok Kabili FR |
| SAN31171  | <LOD | - | <LOD | - | <i>Glochidion</i> | <i>rubrum</i> | Aban G       | 25/8/62  | Tawau        | Serudong          |

|           |      |   |      |   |                   |                 |              |          |              |               |
|-----------|------|---|------|---|-------------------|-----------------|--------------|----------|--------------|---------------|
| jtp735    | <LOD | - | <LOD | - | <i>Glochidion</i> | <i>rubrum</i>   | Pereira JT   | 8/6/00   | Kinabatangan | Sg Imbak FR   |
| SAN66547  | <LOD | - | <LOD | - | <i>Glochidion</i> | <i>rubrum</i>   | Sign G       | 22/8/84  | Kinabatangan | Sg Pinanga FR |
| SAN80621  | <LOD | - | <LOD | - | <i>Glochidion</i> | <i>rubrum</i>   | Talib B      | 25/6/76  | Beaufort     | SiaungauFR    |
| 52808     | <LOD | - | <LOD | - | <i>Glochidion</i> | <i>rubrum</i>   | Talip AH     | 20/8/65  | Lahad Datu   | Silam         |
| SAN114815 | <LOD | - | <LOD | - | <i>Glochidion</i> | <i>rubrum</i>   | Amin AAS     | 21/10/89 | Sipitang     | Sipitang      |
| SAN82536  | <LOD | - | <LOD | - | <i>Glochidion</i> | <i>rubrum</i>   | Cockburn PF  | 19/10/75 | Beluran      | Sugut FR      |
| 34990     | <LOD | - | <LOD | - | <i>Glochidion</i> | <i>rubrum</i>   | Ahwing J     | 28/3/63  | Lahad Datu   | Tabin FR      |
| SAN135278 | <LOD | - | <LOD | - | <i>Glochidion</i> | <i>rubrum</i>   | Diwol S      | 14/6/97  | Lahad Datu   | Tabin FR      |
| SAN141952 | <LOD | - | <LOD | - | <i>Glochidion</i> | <i>rubrum</i>   | Kulip J      | 21/6/97  | Lahad Datu   | Tabin FR      |
| 37651     | <LOD | - | <LOD | - | <i>Glochidion</i> | <i>rubrum</i>   | Battah M     | 15/10/63 | KotaMarudu   | Tagaroh FR    |
| SAN83644  | <LOD | - | <LOD | - | <i>Glochidion</i> | <i>rubrum</i>   | Kodoh T      | 16/7/76  | Beluran      | Telupid       |
| SAN74603  | <LOD | - | <LOD | - | <i>Glochidion</i> | <i>rubrum</i>   | Shea G       | 25/10/71 | Keningau     | Tulid         |
| SAN116912 | <LOD | - | <LOD | - | <i>Glochidion</i> | <i>rubrum</i>   | Bousi J      | 8/8/86   | Kinabatangan | Ulu Segama FR |
| SAN71052  | <LOD | - | <LOD | - | <i>Glochidion</i> | <i>rubrum</i>   | Talip AH     | 20/7/70  | Kinabatangan | Ulu Segama FR |
| SAN79132  | <LOD | - | <LOD | - | <i>Glochidion</i> | <i>rubrum</i>   | Free M       | 16/8/75  | Kinabatangan | Ulu Segama FR |
| SAN84971  | <LOD | - | <LOD | - | <i>Glochidion</i> | <i>rubrum</i>   | Cockburn PF  | 19/8/76  | Kinabatangan | UluSegama FR  |
| SAN116429 | 51   | - | <LOD | - | <i>Glochidion</i> | <i>sericeum</i> | Gambating A  | 16/10/86 | Ranau        | Ranau         |
| 56247     | 51   | - | <LOD | - | <i>Glochidion</i> | <i>sericeum</i> | Sinanggul HT | 4/6/66   | Lahad Datu   | Mostyn        |
| SAN74953  | <LOD | - | <LOD | - | <i>Glochidion</i> | <i>sericeum</i> | Diwol S      | 11/12/71 | Beluran      | Beluran       |
| SAN129792 | <LOD | - | <LOD | - | <i>Glochidion</i> | <i>sericeum</i> | Fidilis K    | 26/10/90 | Keningau     | Keningau      |
| SAN85837  | <LOD | - | <LOD | - | <i>Glochidion</i> | <i>sericeum</i> | Nordin AA    | 26/6/77  | Keningau     | Keningau      |
| SAN80510  | <LOD | - | <LOD | - | <i>Glochidion</i> | <i>sericeum</i> | Diwol S      | 26/3/76  | Papar        | Kimanis       |
| SAN129552 | <LOD | - | <LOD | - | <i>Glochidion</i> | <i>sericeum</i> | Diwol S      | 18/1/90  | Lahad Datu   | Lahad Datu    |
| 41621     | <LOD | - | <LOD | - | <i>Glochidion</i> | <i>sericeum</i> | Agam A       | 16/4/64  | Lahad Datu   | Lahad Datu    |
| SAN90696  | <LOD | - | <LOD | - | <i>Glochidion</i> | <i>sericeum</i> | Aban G       | 12/11/79 | Kinabatangan | Lamag         |
| SAN95636  | <LOD | - | <LOD | - | <i>Glochidion</i> | <i>sericeum</i> | Fidilis K    | 18/1/83  | Tawau        | Luasong       |
| SAN66866  | <LOD | - | <LOD | - | <i>Glochidion</i> | <i>sericeum</i> | Aban G       | 18/7/70  | Beaufort     | Membakut      |

|           |      |     |      |      |                   |                     |             |          |              |                    |
|-----------|------|-----|------|------|-------------------|---------------------|-------------|----------|--------------|--------------------|
| SAN127982 | <LOD | -   | <LOD | -    | <i>Glochidion</i> | <i>sericeum</i>     | Asik M      | 18/9/89  | Nabawan      | Nabawan            |
| SAN119038 | <LOD | -   | <LOD | -    | <i>Glochidion</i> | <i>sericeum</i>     | Bousi J     | 23/4/87  | Kinabatangan | Pinangah           |
| SAN26731  | <LOD | -   | <LOD | -    | <i>Glochidion</i> | <i>sericeum</i>     | Mujin MA    | 20/10/61 | Ranau        | Poring             |
| SAN155555 | <LOD | -   | <LOD | -    | <i>Glochidion</i> | <i>sericeum</i>     | Alviana D   | 12/9/13  | Tongod       | Sg Imbak VJR       |
| SAN33429  | <LOD | -   | <LOD | -    | <i>Glochidion</i> | <i>sericeum</i>     | Sitiol A    | 18/2/63  | Lahad Datu   | Silabukan FR       |
| SAN78365  | <LOD | -   | <LOD | -    | <i>Glochidion</i> | <i>sericeum</i>     | Diwol S     | 17/7/74  | Sipitang     | Sipitang           |
| SAN110414 | <LOD | -   | <LOD | -    | <i>Glochidion</i> | <i>sericeum</i>     | Gambating A | 17/7/85  | Ranau        | Trus Madi FR       |
| SAN95563  | <LOD | -   | <LOD | -    | <i>Glochidion</i> | <i>sericeum</i>     | Fidilis K   | 13/12/82 | Kinabatangan | UluSegama FR       |
| SAN30586  | 59   | -   | <LOD | -    | <i>Glochidion</i> | <i>singaporense</i> | Aban G      | 29/7/62  | Tawau        | Kalabakan          |
| SAN76078  | <LOD | -   | <LOD | -    | <i>Glochidion</i> | <i>singaporense</i> | Shea G      | 9/9/72   | Pitas        | Bengkoka FR        |
| SAN95599  | 46   | -   | <LOD | -    | <i>Glochidion</i> | sp. un det.         | Fidilis K   | 18/12/82 | Kinabatangan | Ulu Segama FR      |
| SAN144061 | 47   | -   | <LOD | -    | <i>Glochidion</i> | sp. un det.         | Postar JM   | 18/7/01  | Kinabatangan | Maliau Basin       |
| SAN113379 | 49   | -   | <LOD | -    | <i>Glochidion</i> | sp. un det.         | Asik M      | 18/2/86  | Nabawan      | Pandewan           |
| SAN134502 | 52   | -   | <LOD | -    | <i>Glochidion</i> | sp. un det.         | Berhaman A  | 19/4/92  | Tawau        | Tawau Hill Park FR |
| fri41252  | 59   | -   | 8037 | 9650 | <i>Glochidion</i> | sp. un det.         | Soepadmo E  | 4/4/94   | Kinabatangan | Maliau Basin       |
| SAN133343 | 59   | -   | 3674 | 4967 | <i>Glochidion</i> | sp. un det.         | Kulip J     | 23/2/92  | Lahad Datu   | Mt Nicola          |
| SAN117806 | 60   | -   | <LOD | -    | <i>Glochidion</i> | sp. un det.         | Gambating A | 10/6/87  | Ranau        | Ranau              |
| SAN118035 | 60   | -   | <LOD | -    | <i>Glochidion</i> | sp. un det.         | Kessler P   | 24/1/89  | Sandakan     | Sepilok Kabili FR  |
| SAN130133 | 64   | -   | <LOD | -    | <i>Glochidion</i> | sp. un det.         | Sumbing J   | 14/7/92  | Nabawan      | Pensiangan FR      |
| SAN137086 | 64   | -   | 6779 | 8300 | <i>Glochidion</i> | sp. un det.         | Kulip J     | 2/3/93   | Beluran      | Telupid            |
| SAN113912 | 70   | -   | 68   | -    | <i>Glochidion</i> | sp. un det.         | Asik M      | 25/3/86  | Nabawan      | Sapulut            |
| SAN116337 | 71   | -   | <LOD | -    | <i>Glochidion</i> | sp. un det.         | Gambating A | 9/10/86  | Ranau        | Mamut Copper Mine  |
| fri74324  | 76   | -   | 59   | -    | <i>Glochidion</i> | sp. un det.         | Yao TL      | 4/12/10  | Kinabatangan | ImbakV alley       |
| SAN123998 | 97   | -   | <LOD | -    | <i>Glochidion</i> | sp. un det.         | Bousi J     | 4/5/88   | Keningau     | Trus Madi FR       |
| SAN123593 | 163  | -   | 265  | -    | <i>Glochidion</i> | sp. un det.         | Gambating A | 6/10/88  | Ranau        | Ranau              |
| SAN72781  | 267  | 256 | 46   | -    | <i>Glochidion</i> | sp. un det.         | Madani L    | 12/3/71  | Beluran      | Segaliud Lokan FR  |
| SAN137049 | 310  | 270 | 4784 | 6158 | <i>Glochidion</i> | sp. un det.         | Kulip J     | 29/2/92  | Kinabatangan | Bkt Tinkar         |

|           |      |     |      |      |                   |             |             |          |              |                        |
|-----------|------|-----|------|------|-------------------|-------------|-------------|----------|--------------|------------------------|
| SAN96683  | 1527 | 681 | 4461 | 5811 | <i>Glochidion</i> | sp. un det. | Diwol S     | 10/6/83  | Kinabatangan | Bkt Tinkar             |
| 52431     | <LOD | -   | 47   | -    | <i>Glochidion</i> | sp. un det. | Talip AH    | 21/5/65  | Lahad Datu   | Gn Silam               |
| SAN139495 | <LOD | -   | 94   | -    | <i>Glochidion</i> | sp. un det. | Sugau JB    | 10/8/04  | Beluran      | Ulu Tungud FR          |
| SAN123105 | <LOD | -   | 129  | -    | <i>Glochidion</i> | sp. un det. | Gambating A | 1/4/88   | Ranau        | Ranau                  |
| SAN98107  | <LOD | -   | 163  | -    | <i>Glochidion</i> | sp. un det. | Proctor J   | 17/8/83  | Lahad Datu   | Gn Silam               |
| SAN56832  | <LOD | -   | 2064 | 3238 | <i>Glochidion</i> | sp. un det. | Sigin G     | 29/3/84  | Beluran      | Telupid                |
| SAN25065  | <LOD | -   | 5480 | 6905 | <i>Glochidion</i> | sp. un det. | Chai M      | 3/6/61   | Lahad Datu   | Pulau Sakar            |
| SAN94016  | <LOD | -   | 5957 | 7418 | <i>Glochidion</i> | sp. un det. | Aban G      | 5/8/81   | Beluran      | Telupid                |
| 36885     | <LOD | -   | <LOD | -    | <i>Glochidion</i> | sp. un det. | Madani L    | 6/11/63  | Beaufort     | Beaufort               |
| jtp2      | <LOD | -   | <LOD | -    | <i>Glochidion</i> | sp. un det. | Pereira JT  | 28/6/94  | Ranau        | Bundu Tuhan            |
| SAN152230 | <LOD | -   | <LOD | -    | <i>Glochidion</i> | sp. un det. | Markus G    | 30/7/10  | Keningau     | Crocker Range          |
| SAN131115 | <LOD | -   | <LOD | -    | <i>Glochidion</i> | sp. un det. | Francis A   | 27/8/90  | Lahad Datu   | Danum Valley           |
| SAN148042 | <LOD | -   | <LOD | -    | <i>Glochidion</i> | sp. un det. | Julia S     | 5/7/06   | Lahad Datu   | Danum Valley           |
| SAN92792  | <LOD | -   | <LOD | -    | <i>Glochidion</i> | sp. un det. | Aban G      | 24/2/82  | Sandakan     | Garinono FR            |
| SAN78456  | <LOD | -   | <LOD | -    | <i>Glochidion</i> | sp. un det. | Diwol S     | 6/3/75   | Beaufort     | Gn Lumaku FR           |
| jbs22     | <LOD | -   | <LOD | -    | <i>Glochidion</i> | sp. un det. | Sugau JB    | 9/7/94   | Lahad Datu   | Gn Silam               |
| SAN102071 | <LOD | -   | <LOD | -    | <i>Glochidion</i> | sp. un det. | Lee YF      | 29/8/84  | Lahad Datu   | Gn Silam               |
| SAN81292  | <LOD | -   | <LOD | -    | <i>Glochidion</i> | sp. un det. | Arshid T    | 19/2/75  | Sandakan     | Gum-Gum FR             |
| SAN77579  | <LOD | -   | <LOD | -    | <i>Glochidion</i> | sp. un det. | Diwol S     | 9/5/73   | Beaufort     | Haligolat              |
| SAN152695 | <LOD | -   | <LOD | -    | <i>Glochidion</i> | sp. un det. | Suzana S    | 30/11/10 | Kinabatangan | Imbak Canyon           |
| fri74280  | <LOD | -   | <LOD | -    | <i>Glochidion</i> | sp. un det. | Yao TL      | 30/11/10 | Kinabatangan | Imbak Valley           |
| SAN94781  | <LOD | -   | <LOD | -    | <i>Glochidion</i> | sp. un det. | Fidilis K   | 22/4/82  | Tawau        | Kalabakan              |
| 41366     | <LOD | -   | <LOD | -    | <i>Glochidion</i> | sp. un det. | Jawanting A | 9/2/64   | KotaBelud    | Kelawat FR             |
| SAN110906 | <LOD | -   | <LOD | -    | <i>Glochidion</i> | sp. un det. | Asik M      | 13/3/85  | Keningau     | Keningau               |
| SAN87660  | <LOD | -   | <LOD | -    | <i>Glochidion</i> | sp. un det. | Aban G      | 20/7/78  | Ranau        | Kinabalu National Park |
| SAN68082  | <LOD | -   | <LOD | -    | <i>Glochidion</i> | sp. un det. | Saikeh L    | 14/10/69 | Kunak        | Kunak                  |

|           |      |   |      |   |                   |             |             |          |              |               |
|-----------|------|---|------|---|-------------------|-------------|-------------|----------|--------------|---------------|
| SAN25246  | <LOD | - | <LOD | - | <i>Glochidion</i> | sp. un det. | Mujin MA    | 8/8/61   | Ranau        | Kundasang     |
| SAN71372  | <LOD | - | <LOD | - | <i>Glochidion</i> | sp. un det. | Talip AH    | 25/11/70 | Sandakan     | Labuk Road FR |
| 35579     | <LOD | - | <LOD | - | <i>Glochidion</i> | sp. un det. | Sayu E      | 25/3/63  | Sandakan     | Labuk Road FR |
| SAN31623  | <LOD | - | <LOD | - | <i>Glochidion</i> | sp. un det. | Chai M      | 11/10/62 | Lahad Datu   | Lahad Datu    |
| SAN52028  | <LOD | - | <LOD | - | <i>Glochidion</i> | sp. un det. | Banang E    | 12/10/65 | Kinabatangan | Lamag         |
| 62162     | <LOD | - | <LOD | - | <i>Glochidion</i> | sp. un det. | Jumin       | 4/6/68   | Kinabatangan | Lamag         |
| 52016     | <LOD | - | <LOD | - | <i>Glochidion</i> | sp. un det. | Banang E    | 12/10/65 | Kinabatangan | Lamag         |
| SAN118440 | <LOD | - | <LOD | - | <i>Glochidion</i> | sp. un det. | Asik M      | 20/10/86 | Keningau     | Lanas         |
| SAN118440 | <LOD | - | <LOD | - | <i>Glochidion</i> | sp. un det. | Asik M      | 20/10/86 | Keningau     | Lanas         |
| SAN149893 | <LOD | - | <LOD | - | <i>Glochidion</i> | sp. un det. | Joel D      | 24/11/08 | Beluran      | Lipaso FR     |
| SAN143211 | <LOD | - | <LOD | - | <i>Glochidion</i> | sp. un det. | Lim SP      | 12/4/00  | Sipitang     | Long Miau     |
| 462       | <LOD | - | <LOD | - | <i>Glochidion</i> | sp. un det. | Geofarry G  | 29/6/97  | Sipitang     | Long Pasia    |
| SAN23638  | <LOD | - | <LOD | - | <i>Glochidion</i> | sp. un det. | Meijer W    | 11/11/60 | Beluran      | Lubok Buaya   |
| SAN140188 | <LOD | - | <LOD | - | <i>Glochidion</i> | sp. un det. | Nasrah Y    | 26/8/95  | Beluran      | Lung Manis    |
| SAN16274  | <LOD | - | <LOD | - | <i>Glochidion</i> | sp. un det. | Wood GHS    | 17/9/55  | Sipitang     | Malaman       |
| SAN144062 | <LOD | - | <LOD | - | <i>Glochidion</i> | sp. un det. | Postar JM   | 18/7/01  | Kinabatangan | Maliau Basin  |
| 23924     | <LOD | - | <LOD | - | <i>Glochidion</i> | sp. un det. | Sario IH    | 25/6/64  | Beluran      | Mamahat FR    |
| SAN86249  | <LOD | - | <LOD | - | <i>Glochidion</i> | sp. un det. | Madani L    | 4/11/84  | Sipitang     | Marintaman    |
| SAN86249  | <LOD | - | <LOD | - | <i>Glochidion</i> | sp. un det. | Madani L    | 4/11/84  | Sipitang     | Marintaman    |
| SAN103279 | <LOD | - | <LOD | - | <i>Glochidion</i> | sp. un det. | Amin AAS    | 21/11/76 | Beaufort     | Membakut      |
| SAN84748  | <LOD | - | <LOD | - | <i>Glochidion</i> | sp. un det. | Talib B     | 14/11/78 | Beaufort     | Membakut      |
| SAN72292  | <LOD | - | <LOD | - | <i>Glochidion</i> | sp. un det. | Saikeh L    | 12/10/72 | Sipitang     | Mendolong     |
| SAN140567 | <LOD | - | <LOD | - | <i>Glochidion</i> | sp. un det. | Maidil A    | 10/4/96  | Sipitang     | Mesapol       |
| SAN133585 | <LOD | - | <LOD | - | <i>Glochidion</i> | sp. un det. | Kulip J     | 23/4/97  | Sipitang     | Mesapol FR    |
| SAN77838  | <LOD | - | <LOD | - | <i>Glochidion</i> | sp. un det. | Diwol S     | 17/8/73  | Sipitang     | Mesapol FR    |
| SAN123518 | <LOD | - | <LOD | - | <i>Glochidion</i> | sp. un det. | Gambating A | 2/9/88   | Ranau        | Mesilau       |
| SAN149457 | <LOD | - | <LOD | - | <i>Glochidion</i> | sp. un det. | Suzana S    | 13/5/08  | Semporna     | Mt Pock FR    |

|           |      |   |      |   |                   |             |              |          |          |                   |
|-----------|------|---|------|---|-------------------|-------------|--------------|----------|----------|-------------------|
| jtp837    | <LOD | - | <LOD | - | <i>Glochidion</i> | sp. un det. | Pereira JT   | 1/9/01   | Nabawan  | Nabawan           |
| SAN104333 | <LOD | - | <LOD | - | <i>Glochidion</i> | sp. un det. | Fidilis K    | 19/5/87  | Nabawan  | Nabawan           |
| SAN128056 | <LOD | - | <LOD | - | <i>Glochidion</i> | sp. un det. | Sumbing J    | 12/3/90  | Nabawan  | Nabawan           |
| SAN80874  | <LOD | - | <LOD | - | <i>Glochidion</i> | sp. un det. | Diwol S      | 16/6/76  | Nabawan  | Nabawan           |
| SAN121518 | <LOD | - | <LOD | - | <i>Glochidion</i> | sp. un det. | Gambating A  | 28/4/88  | Ranau    | Nalapak           |
| SAN101933 | <LOD | - | <LOD | - | <i>Glochidion</i> | sp. un det. | Soinin S     | 16/10/89 | Tuaran   | Pahu              |
| SAN121353 | <LOD | - | <LOD | - | <i>Glochidion</i> | sp. un det. | Pius G       | 20/5/87  | Pitas    | Paitan FR         |
| 51643     | <LOD | - | <LOD | - | <i>Glochidion</i> | sp. un det. | Meijer W     | 20/5/65  | Beluran  | Pamol             |
| SAN141798 | <LOD | - | <LOD | - | <i>Glochidion</i> | sp. un det. | Diwol S      | 22/3/99  | Tenom    | Pangi             |
| SAN22208  | <LOD | - | <LOD | - | <i>Glochidion</i> | sp. un det. | Charington C | 30/6/60  | Tenom    | Pangi             |
| SAN42295  | <LOD | - | <LOD | - | <i>Glochidion</i> | sp. un det. | Jawanting A  | 20/5/64  | Tenom    | Pangi             |
| SAN42315  | <LOD | - | <LOD | - | <i>Glochidion</i> | sp. un det. | Jawanting A  | 17/5/64  | Tenom    | Pangi             |
| SAN129338 | <LOD | - | <LOD | - | <i>Glochidion</i> | sp. un det. | Gambating A  | 20/10/88 | Ranau    | Poring            |
| sip-b24   | <LOD | - | <LOD | - | <i>Glochidion</i> | sp. un det. | Sugau JB     | 11/10/98 | Semporna | Pulau Boheydulang |
| SAN109716 | <LOD | - | <LOD | - | <i>Glochidion</i> | sp. un det. | Signin G     | 17/6/85  | Ranau    | Ranau             |
| SAN116343 | <LOD | - | <LOD | - | <i>Glochidion</i> | sp. un det. | Gambating A  | 10/10/86 | Ranau    | Ranau             |
| SAN117806 | <LOD | - | <LOD | - | <i>Glochidion</i> | sp. un det. | Gambating A  | 10/6/87  | Ranau    | Ranau             |
| SAN117943 | <LOD | - | <LOD | - | <i>Glochidion</i> | sp. un det. | Gambating A  | 16/6/87  | Ranau    | Ranau             |
| SAN123119 | <LOD | - | <LOD | - | <i>Glochidion</i> | sp. un det. | Gambating A  | 4/4/88   | Ranau    | Ranau             |
| SAN129390 | <LOD | - | <LOD | - | <i>Glochidion</i> | sp. un det. | Gambating A  | 5/1/89   | Ranau    | Ranau             |
| SAN137115 | <LOD | - | <LOD | - | <i>Glochidion</i> | sp. un det. | Kulip J      | 4/2/93   | Ranau    | Ranau             |
| SAN141702 | <LOD | - | <LOD | - | <i>Glochidion</i> | sp. un det. | Meijer W     | 26/7/94  | Ranau    | Ranau             |
| SAN76915  | <LOD | - | <LOD | - | <i>Glochidion</i> | sp. un det. | Shea G       | 11/5/73  | Ranau    | Ranau             |
| 57696     | <LOD | - | <LOD | - | <i>Glochidion</i> | sp. un det. | Meijer W     |          | Sandakan | Sandakan          |
| SAN135752 | <LOD | - | <LOD | - | <i>Glochidion</i> | sp. un det. | Fidilis K    | 28/1/93  | Nabawan  | Sapulut           |
| SAN60812  | <LOD | - | <LOD | - | <i>Glochidion</i> | sp. un det. | Fox JED      | 7/8/70   | Beluran  | Segaliud Lokan FR |
| SAN73632  | <LOD | - | <LOD | - | <i>Glochidion</i> | sp. un det. | Madani L     | 16/6/71  | Beluran  | Segaliud Lokan FR |

|           |      |   |      |   |                   |             |              |          |            |                   |
|-----------|------|---|------|---|-------------------|-------------|--------------|----------|------------|-------------------|
| SAN73633  | <LOD | - | <LOD | - | <i>Glochidion</i> | sp. un det. | Madani L     | 16/6/71  | Beluran    | Segaliud Lokan FR |
| SAN73637  | <LOD | - | <LOD | - | <i>Glochidion</i> | sp. un det. | Madani L     | 17/6/71  | Beluran    | Segaliud Lokan FR |
| SAN73931  | <LOD | - | <LOD | - | <i>Glochidion</i> | sp. un det. | Madani L     | 23/6/71  | Beluran    | Segaliud Lokan FR |
| 3017      | <LOD | - | <LOD | - | <i>Glochidion</i> | sp. un det. | Jumaat A     | 21/9/83  | Sandakan   | Sepilok Kabili FR |
| SAN24445  | <LOD | - | <LOD | - | <i>Glochidion</i> | sp. un det. | Charington C | 3/3/61   | Sandakan   | Sepilok Kabili FR |
| SAN73084  | <LOD | - | <LOD | - | <i>Glochidion</i> | sp. un det. | Talip AH     | 24/6/76  | Sandakan   | Sepilok Kabili FR |
| 57478     | <LOD | - | <LOD | - | <i>Glochidion</i> | sp. un det. | Sam PP       | 20/10/66 | Sandakan   | Sepilok Kabili FR |
| 61636     | <LOD | - | <LOD | - | <i>Glochidion</i> | sp. un det. | Binideh RP   | 22/8/67  | Sandakan   | Sepilok Kabili FR |
| 34273     | <LOD | - | <LOD | - | <i>Glochidion</i> | sp. un det. | Meijer W     | 15/10/63 | Sandakan   | Sepilok Kabili FR |
| 58003     | <LOD | - | <LOD | - | <i>Glochidion</i> | sp. un det. | Sinanggul HT | 17/4/67  | Lahad Datu | Silabukan FR      |
| SAN149377 | <LOD | - | <LOD | - | <i>Glochidion</i> | sp. un det. | Pius G       | 23/10/07 | Lahad Datu | Silam             |
| SAN138903 | <LOD | - | <LOD | - | <i>Glochidion</i> | sp. un det. | Ignatius B   | 12/8/94  | Sipitang   | Sipitang          |
| SAN138903 | <LOD | - | <LOD | - | <i>Glochidion</i> | sp. un det. | Ignatius B   | 12/8/94  | Sipitang   | Sipitang          |
| SAN139696 | <LOD | - | <LOD | - | <i>Glochidion</i> | sp. un det. | Ignatius B   | 27/7/04  | Sipitang   | Sipitang          |
| SAN141764 | <LOD | - | <LOD | - | <i>Glochidion</i> | sp. un det. | Diwol S      | 21/3/99  | Sipitang   | Sipitang          |
| SAN143183 | <LOD | - | <LOD | - | <i>Glochidion</i> | sp. un det. | Pius G       | 14/4/00  | Sipitang   | Sipitang          |
| SAN150503 | <LOD | - | <LOD | - | <i>Glochidion</i> | sp. un det. | Suzana S     | 2/7/09   | Beluran    | Taviu FR          |
| SAN142577 | <LOD | - | <LOD | - | <i>Glochidion</i> | sp. un det. | Goh SH       | 15/6/98  | Tawau      | Tawau             |
| SAN109475 | <LOD | - | <LOD | - | <i>Glochidion</i> | sp. un det. | Lideh S      | 11/10/85 | Beluran    | Telupid           |
| SAN120138 | <LOD | - | <LOD | - | <i>Glochidion</i> | sp. un det. | Fidilis K    | 14/3/87  | Tenom      | Tenom             |
| SAN120138 | <LOD | - | <LOD | - | <i>Glochidion</i> | sp. un det. | Fidilis K    | 14/3/87  | Tenom      | Tenom             |
| SAN130877 | <LOD | - | <LOD | - | <i>Glochidion</i> | sp. un det. | ?            | 17/5/90  | Tenom      | Tomani            |
| SAN122195 | <LOD | - | <LOD | - | <i>Glochidion</i> | sp. un det. | Fidilis K    | 26/9/88  | Keningau   | Tulid             |
| SAN151909 | <LOD | - | <LOD | - | <i>Glochidion</i> | sp. un det. | Suzana S     | 19/5/10  | Keningau   | Ulu Senagang      |
| SAN146141 | <LOD | - | <LOD | - | <i>Glochidion</i> | sp. un det. | Saw LG       | 23/7/05  | Beluran    | Ulu Tungud FR     |
| SAN146658 | <LOD | - | <LOD | - | <i>Glochidion</i> | sp. un det. | Saw LG       | 24/7/05  | Beluran    | Ulu Tungud FR     |
| SAN146809 | <LOD | - | <LOD | - | <i>Glochidion</i> | sp. un det. | Julia S      | 23/7/05  | Beluran    | Ulu Tungud FR     |



|           |      |     |      |      |                   |                     |           |          |              |                |
|-----------|------|-----|------|------|-------------------|---------------------|-----------|----------|--------------|----------------|
| SAN86353  | <LOD | -   | <LOD | -    | <i>Glochidion</i> | sp. un det.         | Amin AAS  | 16/4/85  | Beaufort     | Weston         |
| SAN150348 | 146  | -   | 7063 | 8605 | <i>Glochidion</i> | sp.1                | Suzana S  | 20/3/09  | Beluran      | Bidu-Bidu FR   |
| SAN150455 | 346  | 282 | 3434 | 4709 | <i>Glochidion</i> | sp.2                | Suzana S  | 24/3/09  | Beluran      | Bidu-Bidu FR   |
| SAN150400 | 418  | 307 | 5748 | 7193 | <i>Glochidion</i> | sp.2                | Suzana S  | 24/3/09  | Beluran      | Bidu-Bidu FR   |
| 53269     | 49   | -   | <LOD | -    | <i>Glochidion</i> | <i>superbum</i>     | Kodoh T   | 18/6/65  | Kinabatangan | Kuala Karamuak |
| 57691     | <LOD | -   | <LOD | -    | <i>Glochidion</i> | <i>superbum</i>     | Zain M    | 26/4/67  | Sandakan     | Batu Sapi      |
| 41119     | <LOD | -   | <LOD | -    | <i>Glochidion</i> | <i>superbum</i>     | Meijer W  | 1963     | Sandakan     | Kebun Cina     |
| SAN84040  | <LOD | -   | <LOD | -    | <i>Glochidion</i> | <i>superbum</i>     | Diwol S   | 23/11/76 | Keningau     | Keningau       |
| SAN102962 | <LOD | -   | <LOD | -    | <i>Glochidion</i> | <i>superbum</i>     | Amin AAS  | 18/11/85 | Beaufort     | Kg Hindian FR  |
| SAN73586  | <LOD | -   | <LOD | -    | <i>Glochidion</i> | <i>superbum</i>     | Kumin M   | 12/8/71  | Sandakan     | Leila FR       |
| 47348     | <LOD | -   | <LOD | -    | <i>Glochidion</i> | <i>superbum</i>     | Ampon B   | 4/5/65   | Sandakan     | Leila FR       |
| 37598     | <LOD | -   | <LOD | -    | <i>Glochidion</i> | <i>superbum</i>     | Hashim A  | 11/9/63  | Sandakan     | Leila FR       |
| SAN80292  | <LOD | -   | <LOD | -    | <i>Glochidion</i> | <i>superbum</i>     | Karim AM  | 8/11/75  | Beaufort     | Maraba         |
| SAN139199 | <LOD | -   | <LOD | -    | <i>Glochidion</i> | <i>superbum</i>     | Sumbing J | 7/7/95   | Tenom        | Melalap        |
| SAN99704  | <LOD | -   | <LOD | -    | <i>Glochidion</i> | <i>superbum</i>     | Sign G    | 26/7/83  | Beluran      | Sg Meliau      |
| SAN155374 | <LOD | -   | <LOD | -    | <i>Glochidion</i> | <i>superbum</i>     | Alviana D | 11/9/13  | Tongod       | Sg ImbakVJR    |
| SAN72484  | <LOD | -   | <LOD | -    | <i>Glochidion</i> | <i>superbum</i>     | Maurus    | 5/12/72  | Keningau     | Sook           |
| SAN92425  | <LOD | -   | <LOD | -    | <i>Glochidion</i> | <i>superbum</i>     | Diwol S   | 24/7/80  | Beluran      | Tangkunan      |
| SAN84340  | <LOD | -   | <LOD | -    | <i>Glochidion</i> | <i>superbum</i>     | Nordin AA | 17/3/77  | Keningau     | Tulid          |
| SAN85607  | <LOD | -   | <LOD | -    | <i>Glochidion</i> | <i>superbum</i>     | Nordin AA | 14/4/77  | Keningau     | Tulid          |
| SAN85830  | <LOD | -   | <LOD | -    | <i>Glochidion</i> | <i>superbum</i>     | Nordin AA | 26/7/77  | Keningau     | Tulid          |
| fri36228  | 43   | -   | <LOD | -    | <i>Glochidion</i> | <i>wallichianum</i> | Saw LG    | 27/4/88  | Kinabatangan | Maliau Basin   |
| SAN120515 | <LOD | -   | <LOD | -    | <i>Glochidion</i> | <i>wallichianum</i> | Majawat G | 16/7/87  | Kinabatangan | Dagat FR       |
| SAN119481 | <LOD | -   | <LOD | -    | <i>Glochidion</i> | <i>wallichianum</i> | Sawan T   | 18/6/87  | Keningau     | Keningau       |
| SAN116756 | <LOD | -   | <LOD | -    | <i>Glochidion</i> | <i>wallichianum</i> | Suin G    | 18/6/86  | Beluran      | Lung Manis     |
| SAN35067  | <LOD | -   | <LOD | -    | <i>Glochidion</i> | <i>wallichianum</i> | Madani L  | 21/3/63  | Nabawan      | Pensiangan     |
